1 **Title**

2 Visualization of ecological successions in lakes subdivided by volcanic  
3 eruption at Akan Caldera, Hokkaido, Japan

4

5 **Short title**

6 Visualization of ecological successions in caldera lakes

7

8 **Author list**

9 Isamu Wakana<sup>1\*</sup>, Yasuro Kadono<sup>2</sup>, Jotaro Urabe<sup>3</sup>, Yuki Tamura<sup>4</sup>, Yoshifusa  
10 Suzuki<sup>5</sup>, Hiroyuki Yamada<sup>6</sup>, Yoichi Oyama<sup>7</sup>, Keiji Wada<sup>8</sup>, Takeshi  
11 Hasegawa<sup>9</sup>, and Masashi Ohara<sup>10</sup>

12

13 <sup>1</sup>Kushiro International Wetland Center, Kushiro, 085-8505 Japan

14 <sup>2</sup> Graduate School of Science, Kobe University, Kobe, 657-8501 Japan

15 <sup>3</sup>Graduate School of Life Science, Tohoku University, Sendai, 980-8577

16 Japan

17 <sup>4</sup>Kankyo Consultant Co., Ltd., Kushiro-cho, 088-0606 Japan

18 <sup>5</sup>Kaiyoutansa Co., Ltd., Otaru, 047-0036 Japan

19 <sup>6</sup>Graduate School of Agriculture, Hokkaido University, Sapporo, 060-8589

20 Japan

21 <sup>7</sup> Faculty of Life and Environmental Sciences, University of Tsukuba,

22 Tsukuba, 305-0006 Japan (Present address: Kushiro City Board of

23 Education, Kushiro, 085-0467 Japan)

24 <sup>8</sup>Hokkaido University of Education, Asahikawa Campus, Asahikawa, 070-

25 0825 Japan

26 <sup>9</sup>Department of Earth Science, Ibaraki University, Mito, 310-0056 Japan

27 <sup>10</sup>Graduate School of Environmental Science, Hokkaido University, Sapporo,

28 060-0810 Japan

29

30 \* Corresponding author

31 E-mail: [akantbe1@seagreen.ocn.ne.jp](mailto:akantbe1@seagreen.ocn.ne.jp)

32

## 33 **ABSTRACT**

34 It is unfeasible to continuously observe ecological succession in lakes  
35 because of the long time-scales involved. Thus, the process has been  
36 inductively deduced by comparing many lakes with different succession  
37 states, or indirectly simulated by tracking studies of smaller water bodies,  
38 experiments using microcosms or mesocosms, and reconstruction of lake  
39 history by sediment analysis. However, the reality of succession processes in  
40 large lakes with slow succession is not well understood, and new approaches  
41 are needed. Theoretically, in a group of large and small lakes of similar ages  
42 and with similar initial and watershed environments the rate of nutrient  
43 accumulation in each lake depends on the ratio of lake size to the watershed  
44 area, and the lakes are predicted to evolve to different trophic levels over  
45 time. Here, we tested this hypothesis on the 10 lakes of varying sizes in  
46 Akan Caldera, Japan, which were formed thousands of years ago by  
47 fragmentation due to volcanic eruptions within the caldera. Topographic  
48 and water quality studies found that the ratio of lake size (area and volume)  
49 to accumulated watershed area, expressed logarithmically, had a positive  
50 linear regression with the total phosphorus concentration, an indicator of

51 trophic level. The trophic levels of the lakes were diverse, including  
52 oligotrophic, mesotrophic, and eutrophic types in the traditional "lake type"  
53 classification based on total phosphorus and chlorophyll-a concentrations.  
54 Furthermore, 21 species of aquatic macrophytes were observed by a diving  
55 survey, and the species composition was classified into five groups  
56 corresponding to the trophic status of the lakes, indicating a conventional  
57 "hydrarch succession". The diversity of water quality and aquatic vegetation  
58 in a group of lakes with similar origins paves the way for new comparative  
59 studies of lakes, including large lakes.

60

## 61 **Introduction**

62 Ecological succession within lakes is not only a major component of  
63 freshwater ecology and limnology, but also a platform for diagnosis and  
64 management of worldwide deteriorating aquatic environments resulting  
65 from human activity since the 20th century [1-7]. In general, lake succession  
66 proceeds thusly: when a lake is first formed the water is oligotrophic with a  
67 paucity of biota, but the trophic level subsequently increases, as trophic  
68 substances inflow from the watershed, and the lake basin shallows from

69 accumulation of sediments. The diversity of biota and biomass increase or  
70 fluctuate throughout this process, and eventually the lake attains the state  
71 of bog or marsh [1-4, 8]. Historically, Forel, the “father” of limnology [4],  
72 explained this transition as analogous to human ageing [9], and this concept  
73 has been widely accepted due to both intuitive and experiential evidence [1,  
74 2, 4, 10]. Forel also pointed out that it is impossible to follow a normal lake’s  
75 evolution, because of the immense time-scales required for a lake to  
76 disappear by sedimentation [9]. Therefore, this general picture of long-term  
77 succession has been indirectly formed by comparing many lakes with  
78 different trophic conditions [10-16], follow-up survey of small-scale dams or  
79 reservoirs [2, 17], experimental microcosms and mesocosms [4, 18-22], and  
80 historical reconstruction of sedimentation processes [5, 8, 23]. Despite these  
81 efforts, however, the perception of ecological succession in large lakes still  
82 relies on many assumptions, due to their long ageing process [2, 18, 24-26].

83         Is there any other approach to visualize lake succession processes,  
84 including within large lakes? In principle, the rate of eutrophication, a  
85 major factor in ecological succession, is determined by lake size, watershed  
86 area and trophic condition of the watershed [4] Therefore, if trophic

87 conditions are equal among different watersheds, the eutrophication rates,  
88 i.e., the rates of nutrient increase, should vary depending on the ratio of the  
89 lake size to the watershed area in each lake. In addition, given a group of  
90 lakes with similar formation time and initial environment, the  
91 concentrations of nutrients is expected to change with a positive linear  
92 regression between the ratios of lake size to watershed area. As described,  
93 these lakes can be considered as a series that evolved into different trophic  
94 levels, providing a new approach to visualizing lake succession. In practice,  
95 however, no study has yet demonstrated this relationship, because nutrient  
96 loading from the watershed is influenced by indigenous variables, such as  
97 land form, soil, erosion, local climate (temperature and rainfall), vegetation,  
98 and land use (farmland, factory and urbanization) in addition to the time  
99 effect [1-4, 10]. We therefore offer insight into this problem by comparing a  
100 group of lakes within a large caldera. The lakes of Akan Caldera, Hokkaido,  
101 Japan, were formed by volcanic eruptions thousands of years ago, which  
102 divided a huge caldera lake into several lakes of varying sizes [27-29]. These  
103 lakes share a similar terrestrial environment within the caldera. In  
104 contrast, the trophic levels in these lakes are known to be diverse, ranging

105 from oligotrophic to eutrophic [30-33], and may show a series of “lake  
106 successions” or “lake types” in the natural ecological succession of lakes [2,  
107 5, 10]. In this paper, we tested the hypothesis that the ratio of lake size to  
108 watershed area may correspond to the trophic level of Akan Caldera lake  
109 water, illustrated by studying the topography and water quality.  
110 Furthermore, since the lake ecological succession is also displayed as  
111 “hydrarch succession” according to changes in aquatic vegetation [2, 5, 10,  
112 34], we examined the correspondence between aquatic macrophyte species  
113 composition and lake trophic levels.

114

## 115 **Materials and methods**

### 116 **Study area**

117 Akan Caldera is situated at the southern end of the Akan-Shiretoko  
118 Volcanic Chain, a volcanic region in eastern Hokkaido, Japan [29]. The  
119 outer shape of the caldera is oblong (24 km east-west × 13 km north-south)  
120 [29], and a “central cone”, Mt. O-akan, rises at the center of its inner basin  
121 (Fig 1). Within the caldera there are lakes and marshes of various sizes  
122 surrounding Mt. O-akan (Fig 1). Lake watersheds are isolated from external

123 input by the caldera-wall [35, 36], and the water systems, connected by  
124 rivers or underground flow [27, 36, 37], are roughly divided north-south and  
125 join at the southern foot of Mt. O-akan, where they then discharge through  
126 Akan River, the notch in the south caldera-wall (Fig 1A).

127

128 **Fig 1. Map and landscape of Akan Caldera Lakes.** (A) The watershed of  
129 Akan Caldera is isolated by a caldera wall shown by red dotted lines, but the  
130 western caldera wall is obscured by volcanos erupting after the formation of the  
131 caldera. Ten lakes surround Mt. O-akan within the caldera, and are connected  
132 by rivers and underground flow from water systems to the north and south. The  
133 water flows converge south of Mt. O-akan and discharge is through the Akan  
134 River. The map was generated by Kashmir 3C [38], a map software. (B) Land  
135 area is mostly covered with subarctic forests except for a town south of Lake  
136 Akan, Akanko-onsen.

137

138 Large lakes are distributed from west to northeast of Mt. O-akan  
139 and smaller lakes are localized from south to east (Fig 1A). This peculiar  
140 lake arrangement is a result of the formation history of the caldera and Mt.



141 O-akan. The Akan region has witnessed more than ten large volcanic  
142 eruptions in the last 1.5 million years, and the present oblong-shaped  
143 caldera was formed by the largest eruption of 200,000 years ago [27, 29].  
144 After the last large eruption (150,000 years ago), a huge lake, "Ko-akanko"  
145 (ancient Lake Akan), was generated in the caldera [27-29]. The lake was  
146 narrowed by post-caldera volcanic activity in the southwest part of the  
147 caldera, and by 110,000 years ago landform of the inside caldera-wall was  
148 almost completed [27-29]. A minor eruption of Mt. O-akan occurred 13,000  
149 years ago slightly southeast of the center of the caldera, and it stopped when  
150 the lava flow reached the caldera-wall, so that Ko-akanko was separated  
151 into large and small basins [27-29].

152         The developmental history of Mt. O-akan also shows that Pond  
153 Hyotan and Pond Junsai of the southern water system were first divided  
154 from Ko-akanko, and other lakes of the northern water system were formed  
155 5,000 to 2,500 years ago [27-29]. The depth charts of the large lakes, Akan,  
156 Panke and Penke, show the remains of valleys on the bottom of the inside  
157 caldera wall extending as far as the base of Mt. O-akan [27, 35, 37]. This  
158 suggests that the water level of Ko-akanko was extremely low or the basin

159 was exposed by discharge through the notch before the eruption of Mt. O-  
160 akan [27]. Therefore, the lakes of the northern water system are thought to  
161 have formed by re-flooding after damming by Mt. O-akan, but the timing of  
162 lake formation and the developmental processes are not fully understood.

163 Akan Caldera occupies a part of Akan-Mashu National Park  
164 (designated in 1934), and is mostly covered with subarctic forests except for  
165 a town on the south side of Lake Akan, Akanko-onsen (Fig 1B) [30]. Only  
166 Lake Akan has been developed as a sightseeing area due to the presence of  
167 Marimo, *Aegagropila linnaei*, a ball-shaped green alga designated a  
168 Japanese natural treasure [30, 39]. Since the 1950s, the increase in tourism  
169 has resulted in eutrophication from sewage discharge. This continued until  
170 the 1980s when public sewage treatment service was provided [40].

171

## 172 **Topography of lakes and watersheds**

173 Lake area and boundary length were calculated using ARCGIS10 (Esri  
174 Japan Co.) based on the 1/25,000 numerical map data of the Geographical  
175 Survey Institute, Japan. Land area includes island areas.

176 Land watershed area was computed using the DEM10m data of the

177 Geographical Survey Institute. After altitude data were changed into raster  
178 (altitude grid), subtle undulations were removed by the Fill tool, and  
179 bearing azimuth of flow was computed by the Flow Direction tool (north; 64,  
180 northeast; 128, east; 1, southeast; 2, south; 4, southwest; 8, west; 16 and  
181 northwest; 32). Accumulation value (number of cells accumulated toward  
182 the direction of flow) computed by the Flow Accumulation tool was extracted  
183 at accumulation values more than 30000 (sl30000) and more than 200  
184 (sl200) by the Reclass command, and each watershed (ws30000, ws200) was  
185 computed by being grouped by every feeder of sl30000 and sl200 by the  
186 Stream Link tool. Finally, the Ws raster was converted into the polygon,  
187 and Ws30000 and ws200 were manually divided as a watershed for each  
188 lake, observing the DEM.

189         Lake volume and mean depth were calculated based on lake charts.  
190         Depth sounding for chart drawing was performed in autumn of 2014 in eight  
191         lakes, excepting Lakes Akan, Panke and Penke which already have lake  
192         charts. The whole lake was uniformly measured by a GPS fish finder  
193         (Lowrance HDS-8, Navico) on a motor boat. Elevation of the lake surface  
194         was obtained by the GNSS survey. The depth-sounding data were converted

195 into contour drawings by chart drawing software, Reefmaster (ReefMaster  
196 Software Ltd.). Residence time was calculated with annual rainfall at 1200  
197 mm [30].

198

## 199 **Water quality**

200 Measurements of physical and chemical variables and collection of lake  
201 water were performed in ten lakes of Akan Caldera from October to  
202 November 2013 and in July 2014. Secchi depth, water temperature (Temp),  
203 electrical conductivity (EC) and pH were directly recorded using a Secchi  
204 disk or portable sensors at the center of each lake. Water was collected at  
205 the same point using 2 l polycarbonate bottles and taken immediately to the  
206 laboratory. Dissolved oxygen (DO) and chemical oxygen demand (COD) were  
207 measured by titration with standard sodium thiosulfate solution and  
208 potassium permanganate solution, respectively. Total nitrogen (TN) and  
209 total phosphorus (TP) were measured by an auto analyzer (AACS-II,  
210 Bran+Luebbe Ltd.). Additionally, an aliquot of the water sample was  
211 filtered onto Whatman GF/F glass fiber filters, and suspended solids (SS)  
212 measured gravimetrically after drying at 110 °C for two hours. Chlorophyll-

213 a (Chl-a), concentrated onto a Whatman GF/F glass filter, was quantified  
214 with a spectrophotometer (UV-1600, Shimadzu Co. Ltd.) after extraction  
215 using methanol (100%). The filtrate was used for measuring dissolved  
216 organic carbon (DOC) with a TOC meter (TOC VC, Shimadzu Co. Ltd.).

217

## 218 **Macrophyte survey**

219 Macrophytes were surveyed and collected by SCUBA diving or snorkeling  
220 along the entire shorelines of Lake Akan (August and October 2012), Lake  
221 Panke (August 2012 and July 2014) and the other eight lakes (October–  
222 November 2013 and July 2014). The maximum depth surveyed was 18 m in  
223 Lake Panke.

224

## 225 **Statistical analysis**

226 A total of 31 variables were analyzed (S1 Table): 11 variables of the lake  
227 topographic factors (elevation, boundary length, lake area [LA], shore line  
228 development, maximum depth, mean depth, lake volume [LV], residence  
229 time, land watershed area [LWA], total watershed area [TWA] which is the  
230 sum of LA and LWA, and accumulated watershed area [AWA] which is the

231 sum of the TWA above a given lake), 6 variables reflecting gauges of inflow  
232 and outflow of materials (LWA-LA ratio, LWA-LV ratio, TWA-LA ratio,  
233 TWA-LV ratio, AWA-LA ratio, AWA-LV ratio) [3], 10 variables of water  
234 chemistry (Temp, pH, DO, EC, SS, Chl-a, DOC, COD, TN, TP), and 4  
235 variables of the macrophyte communities (number of submerged species,  
236 floating-leaved species, free-floating species and total species). Secchi depth  
237 was excluded from the analysis due to missing data (S1 Table).

238 A correlation matrix of these standardized data was made (S2 Table)  
239 and variables with strong correlation coefficients ( $|r| \geq 0.7$ ) were  
240 investigated in detail. In lakes where macrophytes occurred, the  
241 presence/absence of individual species was converted into 1/0 data, and a  
242 cluster analysis was conducted by the Ward method using the Euclid  
243 distance. The BellCurbe (Social Survey Research Information), an add-in  
244 program for Excel, was used for the analysis.

245

## 246 **Results and discussion**

### 247 **Water quality and lake types**

248 The water quality of the 10 lakes was diverse (S1 Table), and classified as

249 oligotrophic (2 lakes), mesotrophic (5 lakes) and eutrophic (3 lakes)  
250 according to Chl-a and TP concentrations (Fig 2A) [7]. Among these lakes,  
251 Pond Junsai (eutrophic) had brownish water with high TN ( $0.438 \text{ mg l}^{-1}$ ),  
252 DOC ( $7.1 \text{ mg l}^{-1}$ ) and Chl-a concentrations ( $12.5 \text{ } \mu\text{g l}^{-1}$ ) (S1 Table), indicating  
253 dystrophic properties [5, 21].

254

255 **Fig 2. Aspects of trophic status in Akan Caldera Lakes.** (A) A variety of lake  
256 types categorized by Chlorophyll-a and total phosphorous (TP) according to the  
257 Organization for Economic Co-Operation and Development (OECD) [7]. Even  
258 though the lakes share the same origin and most of them were formed at the  
259 same time, the lake types are diversified into oligotrophic, mesotrophic and  
260 eutrophic. Additionally, Pond Junsai (red square) has dystrophic characteristics  
261 (S1 Table). (B) Relationship between ratio of accumulated watershed area to  
262 lake volume (AWA/LV) and TP. The AWA/LV shows significant correlation with  
263 TP thought to be a parameter of eutrophication rate, but only Lake Akan (red  
264 square), subjected to anthropogenic eutrophication in the past, shows an  
265 unusually high TP.

266

267 To explore the relationship between water quality and topography, a  
268 correlation matrix was completed on 10 water quality variables and 17  
269 topographic characters (S2 Table). Strong ( $|r| \geq 0.7$ ) and significant ( $p <$   
270  $0.05$ , by test of no correlation) correlation coefficients were found between:  
271 TP and AWA, TP and AWA-LV ratio (AWA/LV), EC and AWA, EC and  
272 AWA-LA ratio (AWA/LA), EC and AWA/LV, pH and shoreline development,  
273 DO and AWA/LV, and Temp and elevation (Table 1). Although correlation  
274 coefficients between TP and AWA/LA, and DO and AWA/LA did not reach  
275  $0.7$  and  $-0.7$ , respectively, both were statistically significant (Table 1).

276

277 **Table 1. Combinations indicating strong correlation coefficients ( $r$ )**

278 **between water quality variables and topographic characters.**

| Water quality | Topography            |                       |                       |                       |
|---------------|-----------------------|-----------------------|-----------------------|-----------------------|
|               | Shoreline development | AWA                   | AWA/LA                | AWA/LV                |
| TP            | -0.052 <sup>n.s</sup> | 0.820 <sup>**</sup>   | 0.665 <sup>*†</sup>   | 0.751 <sup>*†</sup>   |
| EC            | 0.236 <sup>n.s</sup>  | 0.991 <sup>***</sup>  | 0.720 <sup>*†</sup>   | 0.726 <sup>*†</sup>   |
| pH            | 0.885 <sup>***</sup>  | 0.283 <sup>n.s</sup>  | -0.149 <sup>n.s</sup> | -0.205 <sup>n.s</sup> |
| DO            | 0.517 <sup>n.s</sup>  | -0.395 <sup>n.s</sup> | -0.692 <sup>*</sup>   | -0.763 <sup>*</sup>   |
| Temp          | -0.924 <sup>***</sup> | 0.610 <sup>n.s</sup>  | 0.338 <sup>n.s</sup>  | 0.386 <sup>n.s</sup>  |

279



280 The original correlation matrix is available in S2 Table. TP: total phosphorus,  
281 EC: electrical conductivity, DO: dissolved oxygen, Temp: temperature, AWA:  
282 accumulated watershed area, AWA/LA: AWA-lake area ratio, AWA/LV: AWA-  
283 lake volume ratio, \*\*\*:  $p < 0.001$ , \*\*:  $p < 0.01$ , \*:  $p < 0.05$ , n. s.: not significant, †:  
284 Lake Akan as an outlier.

285

286 When two-dimensional plots were drawn on these 10 combinations,  
287 Lake Akan was discriminated as an outlier in TP and AWA/LA, TP and  
288 AWA/LV, EC and AWA/LA, and EC and AWA/LV (Table 1, Fig 2B). As  
289 previously noted, Lake Akan was subject to anthropogenic eutrophication in  
290 the second half of the 20th century [40]. We thus estimated phosphorus  
291 concentration before eutrophication. The oldest  $P_2O_5$  data,  $0.010 \text{ mg l}^{-1}$ ,  
292 measured in Lake Akan in 1931 [41] was calculated at  $0.004 \text{ mg l}^{-1}$   
293 phosphorus by the conversion formula which divides the value of  $P_2O_5$  by  
294 2.29 [10]. This result was close to the regression lines of TP and AWA/LA ( $r$   
295 = 0.787,  $p < 0.05$ ), and TP and AWA/LV ( $r = 0.881$ ,  $p < 0.01$ ) drawn for nine  
296 lakes except for Lake Akan (Fig 3A). The difference ( $0.022 \text{ mg l}^{-1}$ ) from our  
297 observed data ( $0.026 \text{ mg l}^{-1}$ , S1 Table) can be thought of as part of the

298 increase from eutrophication, suggesting that before eutrophication,  
299 AWA/LA and AWA/LV of the lakes including Lake Akan had a tighter linear  
300 regression relationship with TP. Conversely, without including the outlier in  
301 the case of TP and AWA, the resulting plot when Lake Akan TP data was  
302 replaced by the above  $0.004 \text{ mg l}^{-1}$  drew away from the regression line ( $r =$   
303  $0.795$ ,  $p < 0.05$ , Fig 3B).

304

305 **Fig 3. Estimation of phosphorus concentration in Lake Akan before**  
306 **eutrophication.** Because Lake Akan was subject to anthropogenic  
307 eutrophication in the second half of the 20th century [40], phosphorus  
308 concentration before eutrophication was estimated based on data from 1931  
309 [41]. Each regression line is drawn for nine lakes (blue circles) except for Lake  
310 Akan. In (A) relationship between ratio of accumulated watershed area (AWA)  
311 to lake volume and total phosphorus (TP), the 1931 estimate of phosphorus  
312 concentration for Lake Akan (light red square) is significantly lower than the  
313 2013–14 TP data (dark red square), and is close to the regression lines.  
314 Conversely, in (B) the relationship between AWA and TP, the same 1931  
315 estimate is distant from the regression line.

316

317           A strong correlation was observed between EC and TP ( $r = 0.821$ ,  $p <$   
318 0.01, S2 Table). The regression formula ( $y = 819.023x - 2.343$ ) estimated the  
319 EC of Lake Akan at  $0.933 \text{ mS m}^{-1}$ , near the regression lines of EC and  
320 AWA/LA ( $r = 0.973$ ,  $p < 0.001$ ,) and EC and AWA/LV ( $r = 0.979$ ,  $p < 0.001$ )  
321 for the nine lakes when TP was  $0.004 \text{ mg l}^{-1}$  (Fig 4A). By contrast, the  
322 calculated result of Lake Akan EC drew away from the regression between  
323 EC and AWA without the outlier ( $r = 0.988$ ,  $p < 0.001$ , Fig 4B). This  
324 suggests that the involvement of AWA may be invalid, along with the  
325 results of similar substitution of that between TP and AWA, shown in Fig  
326 3B.

327

328 **Fig 4. Estimation of electrical conductivity (EC) in Lake Akan before**  
329 **eutrophication.** Because phosphorus concentration in Lake Akan was  
330 estimated to be significantly lower before eutrophication (Fig. 3), EC showing a  
331 high correlation with total phosphorus (TP) was also examined. The EC for  
332 1931 was calculated at  $0.933 \text{ mS m}^{-1}$  by substituting the estimated phosphorus  
333 concentration for 1931 ( $0.004 \text{ mg l}^{-1}$ ) into the regression formula for EC and TP.

334 Each regression line in the graphs is drawn for nine lakes (blue circles) except  
335 for Lake Akan. In (A) relationship between ratio of accumulated watershed area  
336 (AWA) to lake volume and EC, the 1931 estimate of EC for Lake Akan (light red  
337 square) is significantly lower than the 2013–14 EC data (dark red square), and  
338 is close to the regression lines, similar to the case of phosphorus in Fig. 3.  
339 Conversely, in (B) the relationship between AWA and EC, the same 1931  
340 estimate is distant from the regression line, as in the case of phosphorus.

341

342 The regression line of pH and shoreline development was likewise  
343 drawn without including the outlier (Fig 5). Because shoreline development  
344 is proportional to the length of horizontal littoral zone, the correlation with  
345 pH was presumed to relate to consumption of CO<sub>2</sub> through hydrophytic  
346 photosynthesis [2, 4, 42].

347

348 **Fig 5. Relationship between shoreline development and pH in Akan Caldera**  
349 **Lakes.** Despite the lakes having a rich diversity of lake basin sizes and water  
350 quality, including trophic levels (S1 Table), shoreline development, the degree of  
351 shoreline flexion, is strongly correlated with lake water pH.

352

353           The regression lines of DO and AWA/LA, and DO and AWA/LV were  
354 drawn with a slight negative slope due to the specific low DO data for Lake  
355 Jiro (Fig 6), and may not indicate an environmental gradient. Lake Jiro has  
356 no inflow and outflow rivers (Fig 1A), and the water appears to be supplied  
357 through underground flow from the upstream Lake Akan [43]. However, in  
358 addition to DO, Chl-a, DOC, and COD in Lake Jiro were the lowest  
359 concentrations among the Akan Caldera Lakes, and TP was the highest (S1  
360 Table). Furthermore, a portion of the lake surface of Lake Jiro does not  
361 freeze in winter [43]. These results suggest that other water sources, such  
362 as groundwater, may be involved in water formation in Lake Jiro.

363

364 **Fig 6. Relationship between ratios of accumulated watershed area to lake**  
365 **volume and dissolved oxygen (DO).** Despite high correlation coefficients  
366 (Table 1), regression lines may not indicate an environmental gradient of DO,  
367 because its slight negative slope results from the uniquely low DO data for Lake  
368 Jiro (red square) with a relatively heterogeneous water quality (S1 Table)

369

370 Finally, regardless of the lake's size, water temperature decreases  
371 with elevation upstream, and the difference in water temperature was 3.5°C  
372 for an elevation difference of about 150 m (Fig 7).

373

#### 374 **Fig 7. Relationship between elevation and water temperature in Akan**

375 **Caldera Lakes.** Water temperature is lower in lakes located upstream at higher  
376 elevations, regardless of lake size.

377

#### 378 **Distribution and species composition of macrophytes**

379 We recorded 21 species of macrophytes in total (excluding emergent plants  
380 and macro algae) in 7 lakes, while no macrophyte species were observed in 3  
381 lakes without inflow rivers (S1 Table). The correlation matrix of the number  
382 of macrophyte species was strong and significant with the following  
383 variables among the above-mentioned lake topographic characters (S2  
384 Table): boundary length ( $r = 0.720$ ,  $p < 0.05$ ), shoreline development ( $r =$   
385  $0.703$ ,  $p < 0.05$ ), maximum depth ( $r = 0.924 < 0.001$ ), mean depth (Fig 8,  $r =$   
386  $0.928$ ,  $p < 0.001$ ) and residence time ( $r = 0.921$ ,  $p < 0.001$ ). Several previous  
387 studies on relatively shallow or small lakes and ponds reported that the

388 number of macrophyte species is correlated with lake area and that  
389 MacArthur and Wilson's "the theory of island biogeography", which  
390 theorizes how larger islands have more species than smaller islands, is often  
391 applicable [44-51]. However, in our study no significant correlation was  
392 found between lake area and the number of macrophyte species (S2 Table).  
393 The boundary length and the shoreline development are parameters  
394 affecting horizontal length of the littoral zone, and the magnitude of the  
395 maximum and mean depths and the residence time related to depth and  
396 volume of lake basin contribute to expansion of the vertical littoral zone  
397 under conditions of greater water clarity. Therefore, the number of  
398 macrophyte species in the large lakes of Akan Caldera is presumed to be  
399 more closely related to the area of the littoral zone than the lake area.

400

401 **Fig 8. Effect of lake size on number of aquatic macrophyte species in Akan**

402 **Caldera Lakes.** In total, 21 species were observed in 7 lakes. The number of  
403 species in each lake shows high correlation with mean depth as well as with  
404 maximum depth, boundary length, shoreline development and residence time  
405 (S2 Table). Pond Junsai (red square) has dystrophic water quality (S1 Table)

406 and is dominated by floating-leaved and free-floating plants, whereas most  
407 other lakes have a submerged plant community (S1 Table).

408

409 The two-dimensional plots of the number of macrophyte species and  
410 the above five topographic characters showed that Pond Junsai, a dystrophic  
411 lake, was designated an outlier (Fig 8). Furthermore, when the individual  
412 species was classified as submerged, floating-leaved and free-floating, the  
413 correlation coefficient was significantly greater with the number of species  
414 of submerged plants (S2 Table). The number of species of floating-leaved  
415 and free-floating plants showed significant and strong correlation with the  
416 water quality parameters Chl-a, DOC, COD and TN (S2 Table), with most of  
417 these species localized in Pond Junsai. Thus, we conducted a cluster  
418 analysis to understand species composition of macrophytes in each lake (Fig  
419 9). The cluster was firstly divided into two groups: 6 species of floating-  
420 leaved and free-floating plants of Pond Junsai, and 14 submerged and 1  
421 floating-leaved plants in the other lakes. Pond Junsai contained some  
422 indicator species of the dystrophic water: *Brasenia schreberi* (Fig 10),  
423 *Nuphar pumila* var. *pumila*, *Nymphaea tetragona* var. *tetragona* and



424 *Utricularia macrorhiza* [52]. The remaining species recorded from the other  
425 lakes were classified as oligotrophic, mesotrophic, oligo-mesotrophic and  
426 oligo-meso-eutrophic groups, following the lake-type based on the trophic  
427 status shown in Fig 2A. *Ranunculus nipponicus* var. *submersus* (Fig 10),  
428 *Potamogeton alpinus* and *Isoetes asiatica*, typically found in more pristine  
429 water [52, 53], were designated oligotrophic. *Myriophyllum spicatum* (Fig  
430 10), *Hydrilla verticillata*, *Potamogeton compressus*, *Potamogeton pectinatus*  
431 and *Ceratophyllum demersum*, occurring in more eutrophic settings [52,  
432 53], were designated oligo-mesotrophic. *Potamogeton crispus* (Fig 10),  
433 distributed in a variety of water environments [52], was designated  
434 mesotrophic.

435

436 **Fig 9. Cluster analysis of distribution and species composition of aquatic**  
437 **macrophytes in Akan Caldera Lakes.** The tree diagram was drawn by the  
438 Ward method using Euclid distance based on the 1/0 data converted from the  
439 presence/absence data for the seven lakes where macrophytes occurred.  
440 According to the lake habitat types (Fig. 2A), clusters are classified into five  
441 vegetation types: oligotrophic, mesotrophic, oligo-mesotrophic, oligo-meso-

442 eutrophic, and dystrophic.

443

444 As mentioned above, prior to anthropogenic eutrophication, the  
445 phosphorus level in Lake Akan in the first half of the 20th century appears  
446 to have been much lower than currently (Fig 3). Thus, the current aquatic  
447 flora was also compared with results from the oldest known vegetation  
448 survey conducted in 1897 [54]. Of the ten species of macrophytes in Lake  
449 Akan observed in our study, nine species were also found in 1897, except for  
450 *P. crispus*, classified as mesotrophic. However, the two oligotrophic species  
451 *R. nipponicus* var. *submersus* and *I. asiatica* in the old list were not  
452 confirmed. These results suggest a shift to a more eutrophic vegetation  
453 type.

454

## 455 **Uniqueness of Akan Caldera Lakes**

456 To summarize the results, although the lakes of Akan Caldera have the  
457 same origin, they have developed into a series of oligotrophic, mesotrophic,  
458 eutrophic and dystrophic lakes, after being divided by a volcanic eruption  
459 (Fig 2A). The trophic level of each lake indicated by TP was closely related

460 to the ratio of watershed area (AWA) to lake size (LA and LV) (Fig 2B).  
461 These results strongly suggest the possibility that the rate of eutrophication  
462 was different among the lakes, and we see the various stages of lake  
463 succession in progress in this system. However, the observed TP of Lake  
464 Akan and its downstream neighbors, Lake Jiro and Lake Taro, are assumed  
465 to have been impacted by anthropogenic eutrophication in the past (Fig 3A).  
466 Furthermore, the formation history of the Akan Caldera Lakes suggests  
467 that Ponds Hyotan and Junsai are significantly older than the other lakes  
468 [27-29]. As shown in Fig 2A, Chl-a levels in these two ponds are specifically  
469 higher than those of other lakes, which might be due to differences in time  
470 of formation. To understand the long-term changes in nutrient loading,  
471 including TP, and in primary production, the correct time of formation and  
472 subsequent eutrophication history of each lake should be clarified through  
473 research on lake sediment, etc. In addition, the linear regression of the  
474 relationship between TP and AWA/LA and AWA/LV (Fig 2B) suggests that  
475 the indigenous environmental variables of the watersheds may vary little.  
476 However, in reality, the geology and vegetation within the Akan Caldera are  
477 not uniform [27, 30], and further research is needed to determine the actual

478 phosphorus loading from the watersheds.

479           Macrophyte species composition varied among lakes, driven by lake  
480 trophic conditions (Fig 9), and is indicative of aquatic plant succession, or  
481 “hydrarch succession”. Many species of macrophytes are classified into a  
482 variety of “types” according to environmental characteristics of habitats,  
483 including trophic level [48, 53, 55-59]. Schneider and Melzer [59], for  
484 example, proposed seven categories ranging from oligotrophic to eutrophic  
485 and even polytrophic types. Meanwhile, Lacoul and Freedman [53]  
486 simplified into three categories: oligotrophic, eutrophic, and general types,  
487 based on the opinion that many macrophytes generally have a broad  
488 ecological range, occurring over wide trophic levels, while other species have  
489 a narrower distribution. In our study, however, all of the observed species  
490 belonged to only one of the five occurrence types, with a species-specific  
491 range of trophic level (Fig 10). Thirteen species were distributed among  
492 oligotrophic, mesotrophic and dystrophic lake-types, respectively, and eight  
493 species occurred in the oligotrophic and mesotrophic, and the oligotrophic,  
494 mesotrophic and eutrophic-type lakes with wider trophic ranges. These  
495 results explain how the species composition of macrophytes in the Akan

496 Caldera Lakes with different trophic types is determined by the combination  
497 of species with different trophic requirements. Importantly, we noted  
498 vegetation changes in Lake Akan due to anthropogenic eutrophication: this  
499 was characterized by disappearance of oligotrophic-type species, appearance  
500 of mesotrophic-type species, and survival of oligo-mesotrophic and oligo-  
501 meso-eutrophic-type species, when the trophic level of Lake Akan shifted  
502 from oligotrophic to mesotrophic as shown in Fig 10. This might be the first  
503 example to clearly and simply illustrate the replacement of species in an  
504 aquatic plant community caused by the change of trophic level. Further  
505 investigation is necessary to test whether this is a universal phenomenon in  
506 limnology.

507

508 **Fig 10. Determination model for macrophyte species composition**  
509 **corresponding to trophic types in Akan Caldera Lakes.** Individual  
510 macrophyte species belong to any one of the five occurrence types of  
511 macrophytes, accompanied by inherent trophic type(s) and range. Macrophytes  
512 of oligotrophic-, mesotrophic- and dystrophic-occurrence types are only  
513 distributed within oligotrophic-, mesotrophic- and dystrophic-type lakes,

514 respectively. In contrast, within oligo-mesotrophic- and oligo-meso-eutrophic-  
515 occurrence types, macrophytes are able to occur widely in  
516 oligotrophic/mesotrophic- and oligotrophic/mesotrophic/eutrophic-type lakes.  
517 Accordingly, species composition of macrophytes in oligotrophic- and  
518 mesotrophic-type lakes is determined by combination of the occurrence types,  
519 oligotrophic/oligo-mesotrophic/oligo-meso-eutrophic and mesotrophic/oligo-  
520 mesotrophic/oligo-meso-eutrophic. In eutrophic and dystrophic lakes, oligo-  
521 meso-eutrophic- and dystrophic-occurrence types are distributed, respectively.

522

523         Trophic levels are not the only factor known to affect macrophyte  
524 distribution and species composition. At a smaller scale, the following  
525 physical factors have been important in producing environmental gradients  
526 between or within lakes: topography, geological qualities, inflow waters as  
527 physical factors in the watershed, lake basin morphology (mainly depth and  
528 area), water temperature, light conditions, turbidity, current flow, substrate  
529 (sediment). And, chemical factors in play include inorganic ions, salinity,  
530 organic matter, conductivity, alkalinity, pH and nutrients [11, 13, 21, 46, 48,  
531 51, 53, 55, 56, 60-65]. As this itemization indicates, a comprehensive

532 understanding of the mechanisms that determine the distribution and  
533 species composition of macrophytes is difficult, due to multiple influencing  
534 factors. In the Akan Caldera Lakes, species distribution was related to  
535 trophic conditions (Fig 9 and 10), while number of species was closely  
536 related to lake size (Fig 8). In general, species diversity at smaller scales  
537 increased, depending upon spatial environmental heterogeneity [66, 67].  
538 Lakes Akan, Panke and Penke, all large and oligo and mesotrophic lakes  
539 with high species count, appear to offer a large variety of the physical and  
540 chemical factors noted above. The topography of capes, bays and islands in  
541 these lakes diversifies wave action and substrate via varying wind-wave  
542 parameters, and “fetch”, i.e. the length of the lake surface over which wind  
543 blows [4, 53]. Inflow rivers locally alter substrate, current and water  
544 quality, greater water depth lowers water temperature and reduces  
545 substrate grain size, and oligo/mesotrophic water allows sunlight to  
546 penetrate deeper into the littoral zone, leading to a gradual gradient in the  
547 light environment [4, 5, 21, 47, 48, 51, 53, 60, 64]. This environmental  
548 variability may offer habitat for a number of macrophytes in these large  
549 lakes. On the other hand, Pond Junsai, dominated by floating-leaved and

550 free-floating plants, is the only example of dystrophic water quality in the  
551 Akan Caldera Lakes. Its brownish lake water, derived from high DOC  
552 containing abundant humic substances, suppresses submerged plant growth  
553 due to high light absorption [5, 21, 48, 53, 64]. Humic substances are  
554 thought to originate from decomposing terrestrial and/or littoral plant  
555 material [5, 22, 42, 53]. Thus, eutrophication in Pond Junsai may have  
556 undergone a different process than in the other lakes because of differing  
557 surrounding vegetation, even if the initial process was the same. To  
558 understand the factors affecting plant distribution the relationships  
559 between detailed macrophyte distribution and habitat micro-environments  
560 in each lake, including impacts of the surrounding vegetation, must be  
561 elucidated.

562

## 563 **Conclusions**

564 In this study, we demonstrated that the ratio of Akan Caldera lake size to  
565 watershed area was linearly-positive regressed with TP concentration, an  
566 indicator of trophic level in lakes. Furthermore, the variety of trophic levels  
567 in the lakes, ranging from oligotrophic to eutrophic, coincided with the "lake



568 succession" or "lake type" series of ecological succession in lakes. Further,  
569 "hydrarch succession", a change in the species composition of macrophytes,  
570 also indicates a regular series corresponding to the trophic levels. These  
571 facts indicate that the unique eutrophication rates, defined by the ratio of  
572 lake size to watershed area, may have diversified the water quality and the  
573 aquatic flora of the lakes. Uniquely, this possibly illustrates lake ecological  
574 succession in "real time", previously thought impossible to see [2, 9, 18, 24].  
575 In other words, the Akan Caldera Lakes can be seen as a massive  
576 experiment conducted by nature in an "Akan Caldera Laboratory", or seen  
577 as catalog visualizing a freshwater ecosystem, focusing on lake and  
578 hydrarch succession. The essence of ecological succession is, simply put,  
579 nothing more than a developing and changing process of biodiversity [67]. In  
580 this context, the Akan Caldera Lakes will enable a new approach to the  
581 comparative study of spatio-temporal fluctuations in biodiversity and  
582 aquatic environments, including responses to changes in the surrounding  
583 environment, especially climate change, now seen as an issue of paramount  
584 importance [24, 26].  
585

## 586 **Acknowledgements**

587 A part of this study is "Research of the aquatic plants in Lake Akan and  
588 circumference lakes" and "Lake charts drawing of Lake Akan and  
589 circumference lakes" conducted in 2012, 2013 and 2014 by the Ministry of  
590 Environment of Japan. The City of Kushiro provided facilities and funding  
591 for compilation of the study. Árni Einarrson, Mývatn Research Station,  
592 Iceland, provided advice on research design. Takehiko Fukushima,  
593 University of Tsukuba and Koichi Kamiya, Ibaraki Kasumigaura  
594 Environmental Science Center supported the water analyses. The Hokkaido  
595 Shimbun Press contributed to the aerial photography. Satoshi Kofuku and  
596 Kokoro kikuchi, IDEA Consultants, Inc., assisted with literature research.  
597 Shuji Hino, Yamagata University and Yasushi Ishikawa, Hokkaido  
598 Research Organization, advised regarding caldera lakes and calculation of  
599 water quality. Mami Yamazaki, Sapporo Museum Activity Center, provided  
600 advice on macrophytes.

601

## 602 **References**

603 1. Whittaker RH. Communities and ecosystems. 2nd ed. New York:

- 604 Macmillan; 1975.
- 605 2. Sakamoto M. Ecological succession, II. Tokyo: Kyoritsu-Shuppan; 1976.
- 606 (in Japanese)
- 607 3. Owen OS. Natural resource conservation: an ecological approach, 4th ed.
- 608 New York: Macmillan; 1985.
- 609 4. Horne AJ, Goldman CR. Limnology, 2nd ed. New York: McGraw-Hill;
- 610 1994.
- 611 5. Wetzel RG. Limnology: lake and river ecosystems, 3rd ed. San Diego:
- 612 Academic Press; 2001.
- 613 6. Schindler DW, Vallentyne JR. The algal bowl, overfertilization of the
- 614 world's freshwaters and estuaries. Edmonton: University of Alberta
- 615 Press; 2008.
- 616 7. Vollenweider R, Kerekes J. Eutrophication of waters: Monitoring,
- 617 assessment and control. Paris: Organization for Economic Co-Operation
- 618 and Development (OECD); 1982.
- 619 8. Lindeman RL. The trophic-dynamic aspect of ecology. Ecology. 1942;23:
- 620 399-417. <https://doi.org/10.2307/1930126>.
- 621 9. Forel FA. Handbuch der Seenkunde: allgemeine Limnologie. Stuttgart:

- 622 J. Engelhorn; 1901. (in Germany)
- 623 10. Yoshimura S. Limnology. Tokyo: Sanseido; 1937. (in Japanese)
- 624 11. Pearsall WH. The development of vegetation in the English lakes,  
625 considered in relation to the general evolution of glacial lakes and rock  
626 basins. Proc R Soc B, Biol Sci. 1921;92: 259-84.  
627 <https://doi.org/10.1098/rspb.1921.0024>.
- 628 12. Dachnowski A. Peat deposits of Ohio: their origin, formation and uses.  
629 Columbus: Division of Geological Survey, Ohio; 1912.  
630 <http://hdl.handle.net/1811/78409>
- 631 13. Pearsall WH. The aquatic vegetation of the English lakes. J. Ecol.  
632 1920;8: 163-201. doi: 10.2307/2255612.
- 633 14. Dachnowski AP. Factors and problems in the selection of peat lands for  
634 different uses. Washington, D. C.: United States Department of  
635 Agriculture; 1926. <https://doi.org/10.5962/bhl.title.108906>
- 636 15. Kormondy EJ. Concepts of ecology. 2nd ed. Englewood Cliffs: Prentice-  
637 Hall; 1969. <http://ci.nii.ac.jp/ncid/BA1127514X>
- 638 16. Odum EP. Fundamentals of ecology, 3rd ed. Philadelphia: Saunders;  
639 1971.

- 640 17. Morishita I. Dam lake ecology. Tokyo: Sankaidou; 1983. (in Japanese)
- 641 18. Margalef R. Perspectives in ecological theory. Chicago: University of  
642 Chicago Press; 1968.
- 643 19. Odum EP. The strategy of ecosystem development. Science. 1969;164:  
644 262-270. <http://habitat.aq.upm.es/boletin/n26/aeodu.en.html>
- 645 20. Wetzel RG, Likens GE. Limnological analyses, 3ed ed. New York:  
646 Springer; 2000.
- 647 21. Dodson SI. Introduction to limnology. New York: McGraw-Hill; 2005.
- 648 22. Dodds WK, Whiles MR. Freshwater ecology, 2nd ed. Burlington:  
649 Academic Press; 2010.
- 650 23. Smith J, Appleby P, Battarbee R, Dearing J, Flower R, Haworth E, et al.  
651 Environmental history and palaeolimnology. Springer Science &  
652 Business Media; 1991.
- 653 24. Kling GW. A lake's life is not its own. Nature. 2000;408: 149-50. doi:  
654 <https://doi.org/10.1038/35041659>.
- 655 25. Johnson EA, Miyanishi K. Testing the assumptions of chronosequences  
656 in succession. Ecol Lett. 2008;11: 419-431. doi:  
657 <https://doi.org/10.1111/j.1461-0248.2008.01173.x>

- 658 26. Sayer C, Roberts N, Sadler J, David C, Wade P. Biodiversity changes in  
659 a shallow lake ecosystem: a multi - proxy palaeolimnological analysis. *J*  
660 *Biogeogr.* 1999;26: 97-114. doi: <https://doi.org/10.1111/j.1365->  
661 [2699.1999.00298.x](https://doi.org/10.1111/j.1365-2699.1999.00298.x)
- 662 27. Satoh H. Akanko, explanatory text of the geological map of Japan,  
663 Kushiro, No. 7. Tokyo: Geological Survey of Japan; 1965. (in Japanese  
664 with English summary)
- 665 28. Tamada J, Nakagawa M. Eruption history of Oakan volcano, eastern  
666 Hokkaido, Japan. *Kazan.* 2009;54: 147-62. (in Japanese with English  
667 summary)
- 668 29. Hasegawa T, Nakagawa M. Large scale explosive eruptions of Akan  
669 volcano, eastern Hokkaido, Japan: a geological and petrological case  
670 study for establishing tephro-stratigraphy and-chronology around a  
671 caldera cluster. *Quat Int.* 2016;397: 39-51. doi:  
672 <https://doi.org/10.1016/j.quaint.2015.07.058>.
- 673 30. Maeda Ippoen Foundation. The nature of Akan National Park, 1993.  
674 Akan: Maeda Ippoen Foundation; 1994. (in Japanese)
- 675 31. Hino S, Mikami H, Arisue J, Ishikawa Y, Imada K, Yasutomi R, et al.

- 676 Limnological characteristics and vertical distribution of phytoplankton  
677 in oligotrophic lake Akan-Panke. *Jpn J Limnol.* 1998;59: 263-279. doi:  
678 <https://doi.org/10.3739/rikusui.59.263>
- 679 32. Tanaka M. The lakes in Japan. Nagoya: Nagoya University Press; 1992.  
680 (in Japanese)
- 681 33. Hokkaido Institute of Environmental Science. Lakes and marshes in  
682 Hokkaido, revised edition. Sapporo: Hokkaido Institute of  
683 Environmental Science; 2005. (in Japanese)
- 684 34. Clements FE. Plant succession: an analysis of the development of  
685 vegetation. Washington: Carnegie Institution of Washington; 1916.  
686 <http://ci.nii.ac.jp/ncid/BA39490309>
- 687 35. Tanakadate S. Research report on the volcano lakes in Hokkaido.  
688 Sapporo: Hokkaido Government; 1925. (in Japanese)
- 689 36. Takayasu S, Igarashi H, Sawa K. Lake survey, Lake Akan. *Sci Rep*  
690 *Hokkaido Fish Exp Stn.* 1930;21: 67-92. (in Japanese)
- 691 37. Takayasu S, Kondo K. River and lake survey, Lake Panke and Lake  
692 Penke. *Sci Rep Hokkaido Fish Exp Stn.* 1936;39: 1-24. (in Japanese)
- 693 38. Sugimoto T. Introduction to Kashmir C3. Tokyo: Jitsugyo no Nihon Sha;

- 694           2010. (in Japanese)
- 695    39. Umekawa T, Wakana I, Ohara M. Reproductive behavior and role in  
696           maintaining an aggregative form of the freshwater green alga Marimo,  
697           *Aegagropila linnaei*, in Lake Akan, Hokkaido, Japan. *Aquat Bot.*  
698           2021;168: 103309. doi: <https://doi.org/10.1016/j.aquabot.2020.103309>.
- 699    40. Igarashi S, Ishikawa Y, Mikami H. Long-term changes in limnological  
700           characteristics in Lake Akan, Hokkaido. *Res Rep NIES, Japan.*  
701           2000;153: 34-54. (in Japanese)
- 702    41. Miyadi D. Studies on the bottom fauna of Japanese lakes, VII. Lakes of  
703           Hokkaido. *Jpn J Zool.* 1932;4: 223-52.
- 704    42. Brönmark C, Hansson L-A. The biology of lakes and ponds, 2nd ed.  
705           Oxford: Oxford University Press; 2005.
- 706    43. Motoda S. The lakes in Hokkaido *Sci Rep Hokkaido Fish Hatchery.*  
707           1950;5: 1-96. (in Japanese)
- 708    44. Wilson EO, MacArthur RH. The theory of island biogeography.  
709           Princeton: Princeton University Press; 1967.
- 710    45. Møller TR, Rørdam CP. Species numbers of vascular plants in relation  
711           to area, isolation and age of ponds in Denmark. *Oikos.* 1985;45: 8-16.



- 712 doi: <https://doi.org/10.2307/3565216>.
- 713 46. Rørslett B. Principal determinants of aquatic macrophyte richness in  
714 northern European lakes. *Aquat Bot.* 1991;39: 173-93. doi:  
715 [https://doi.org/10.1016/0304-3770\(91\)90031-Y](https://doi.org/10.1016/0304-3770(91)90031-Y).
- 716 47. Weiher E, Boylen CW. Patterns and prediction of  $\alpha$  and  $\beta$  diversity of  
717 aquatic plants in Adirondack (New York) lakes. *Can. J. Bot.* 1994;72:  
718 1797-804. doi: [doi.org/10.1139/b94-221](https://doi.org/10.1139/b94-221).
- 719 48. Toivonen H, Huttunen P. Aquatic macrophytes and ecological gradients  
720 in 57 small lakes in southern Finland. *Aquat Bot.* 1995;51: 197-221. doi:  
721 [https://doi.org/10.1016/0304-3770\(95\)00458-C](https://doi.org/10.1016/0304-3770(95)00458-C).
- 722 49. Linton S, Goulder R. Botanical conservation value related to origin and  
723 management of ponds. . *Aquat Conserv Mar Freshw Ecosyst.* 2000;10:  
724 77-91. doi: [https://doi.org/10.1002/\(SICI\)1099-  
725 0755\(200003/04\)10:2<77::AID-AQC391>3.0.CO;2-Y](https://doi.org/10.1002/(SICI)1099-0755(200003/04)10:2<77::AID-AQC391>3.0.CO;2-Y).
- 726 50. Mäkelä S, Huitu E, Arvola L. Spatial patterns in aquatic vegetation  
727 composition and environmental covariates along chains of lakes in the  
728 Kokemäenjoki watershed (S. Finland). *Aquat Bot.* 2004;80: 253-69. doi:  
729 <https://doi.org/10.1016/j.aquabot.2004.08.006>.

- 730 51. Søndergaard M, Jeppesen E, Jensen JP. Pond or lake: does it make any  
731 difference? Arch Hydrobiol. 2005;162: 143-65. doi: 10.1127/0003-  
732 9136/2005/0162-0143.
- 733 52. Kadono Y. A field guide to aquatic plants of Japan. Tokyo: Bun-ichi Sogo  
734 Shuppan; 2014. (in Japanese)
- 735 53. Lacoul P, Freedman B. Environmental influences on aquatic plants in  
736 freshwater ecosystems. Environ Rev. 2006;14: 89-136. doi:  
737 <https://doi.org/10.1139/a06-001>.
- 738 54. Kawakami T. Collection record in Akan, Kushiro Province. Bot Mag  
739 Tokyo. 1898;12: 220-225. (in Japanese)
- 740 55. Seddon B. Aquatic macrophytes as limnological indicators. Freshw Biol.  
741 1972;2: 107-30. doi: [doi.org/10.1111/j.1365-2427.1972.tb00365.x](https://doi.org/10.1111/j.1365-2427.1972.tb00365.x).
- 742 56. Wiegleb G. A study of habitat conditions of the macrophytic vegetation  
743 in selected river systems in Western Lower Saxony (Federal Republic of  
744 Germany). Aquat Bot. 1984;18(4): 313-52. doi:  
745 [https://doi.org/10.1016/0304-3770\(84\)90055-X](https://doi.org/10.1016/0304-3770(84)90055-X).
- 746 57. Mäkirinta U. Classification of South Swedish Isoetid vegetation with the  
747 help of numerical methods. Vegetatio. 1989;81: 145-157.

- 748 [https://link.springer.com/chapter/10.1007/978-94-009-2432-1\\_12](https://link.springer.com/chapter/10.1007/978-94-009-2432-1_12).
- 749 58. Heegaard E, Birks HH, Gibson CE, Smith SJ, Wolfe-Murphy S. Species–  
750 environmental relationships of aquatic macrophytes in Northern  
751 Ireland. *Aquat Bot.* 2001;70: 175-223. doi: [https://doi.org/10.1016/S0304-](https://doi.org/10.1016/S0304-3770(01)00161-9)  
752 [3770\(01\)00161-9](https://doi.org/10.1016/S0304-3770(01)00161-9).
- 753 59. Schneider S, Melzer A. The trophic index of macrophytes (TIM)—a new  
754 tool for indicating the trophic state of running waters. *Internat Rev.*  
755 *Hydrobiol.* 2003;88: 49-67. doi: <https://doi.org/10.1002/iroh.200390005>.
- 756 60. Hutchinson GE. A treatise on limnology, Vol III, Limnological Botany.  
757 New York: John Wiley; 1975.
- 758 61. Spence DHN. Factors controlling the distribution of freshwater  
759 macrophytes with particular reference to the lochs of Scotland. *J Ecol.*  
760 *1967;55:* 147-170. doi: [10.2307/2257723](https://doi.org/10.2307/2257723).
- 761 62. Kadono Y. Occurrence of aquatic macrophytes in relation to pH,  
762 alkalinity, Ca<sup>++</sup>, Cl<sup>-</sup> and conductivity. *Jap J Ecol.* 1982;32: 39-44. doi:  
763 [10.18960/seitai.32.1\\_39](https://doi.org/10.18960/seitai.32.1_39).
- 764 63. Vestergaard O, Sand-Jensen K. Alkalinity and trophic state regulate  
765 aquatic plant distribution in Danish lakes. *Aquat Bot.* 2000;67: 85-107.

- 766 doi: [https://doi.org/10.1016/S0304-3770\(00\)00086-3](https://doi.org/10.1016/S0304-3770(00)00086-3).
- 767 64. Søndergaard M, Johansson LS, Lauridsen TL, Jørgensen, TB,  
768 Liboriussen L, Jeppesen E. Submerged macrophytes as indicators of the  
769 ecological quality of lakes. *Freshw Biol.* 2010;55: 893-908. doi:  
770 <https://doi.org/10.1111/j.1365-2427.2009.02331.x>.
- 771 65. Lukács BA, Tóthmérész B, Borics G, Várbíró G, Juhász P, Kiss B, et al.  
772 Macrophyte diversity of lakes in the Pannon Ecoregion (Hungary).  
773 *Limnologica.* 2015;53: 74-83. doi
- 774 66. Wright DH, Currie DJ, Maurer BA. Energy supply and patterns of  
775 species richness on local and regional scales. In: Ricklefs RE, Schluter D,  
776 editors. *Species diversity in ecological communities: historical and*  
777 *geographical perspectives.* 7. Chicago: University of Chicago Press; 1993.
- 778 67. Miyashita T, Noda T. *Community ecology.* Tokyo: University of Tokyo  
779 Press; 2003. (in Japanese)
- 780

## 781 **Supporting information**

782 S1 Table. Data set of topography, water quality and number of species of macrophytes

783 in Akan Caldera Lakes.

784 S2 Table. Correlation matrix of topography, water quality and number of species of

785 macrophytes in Akan Caldera Lakes.



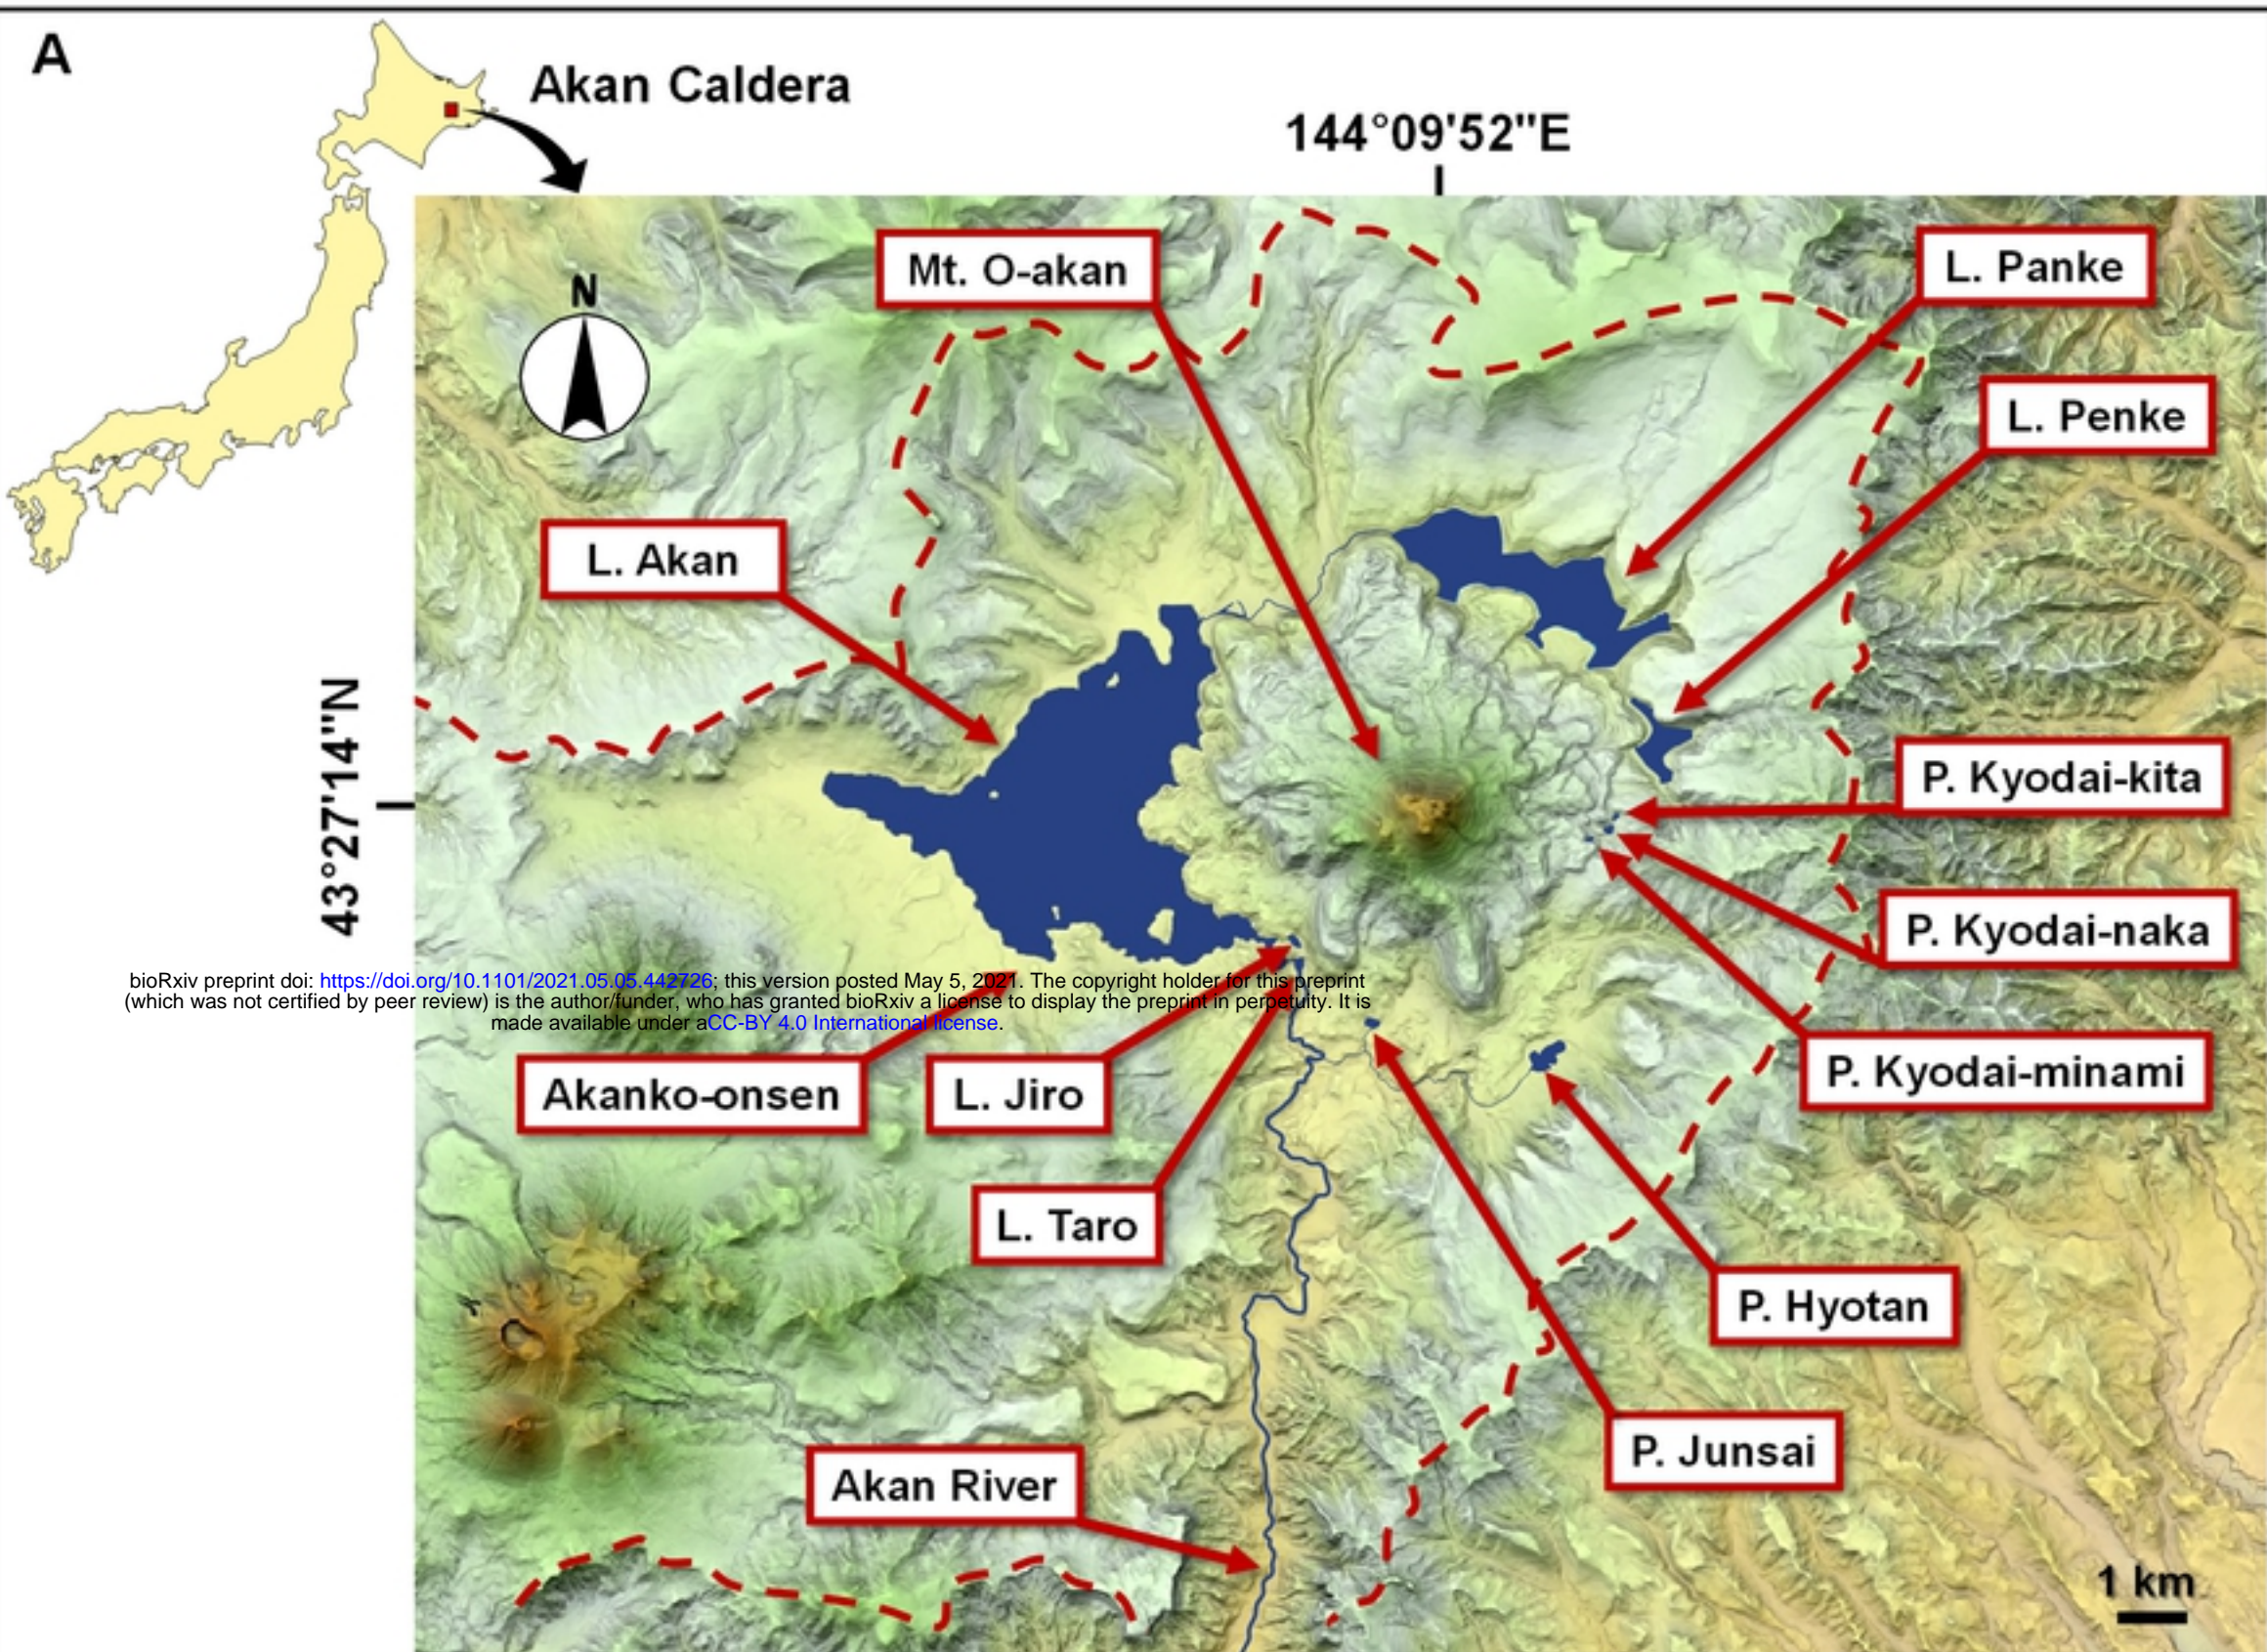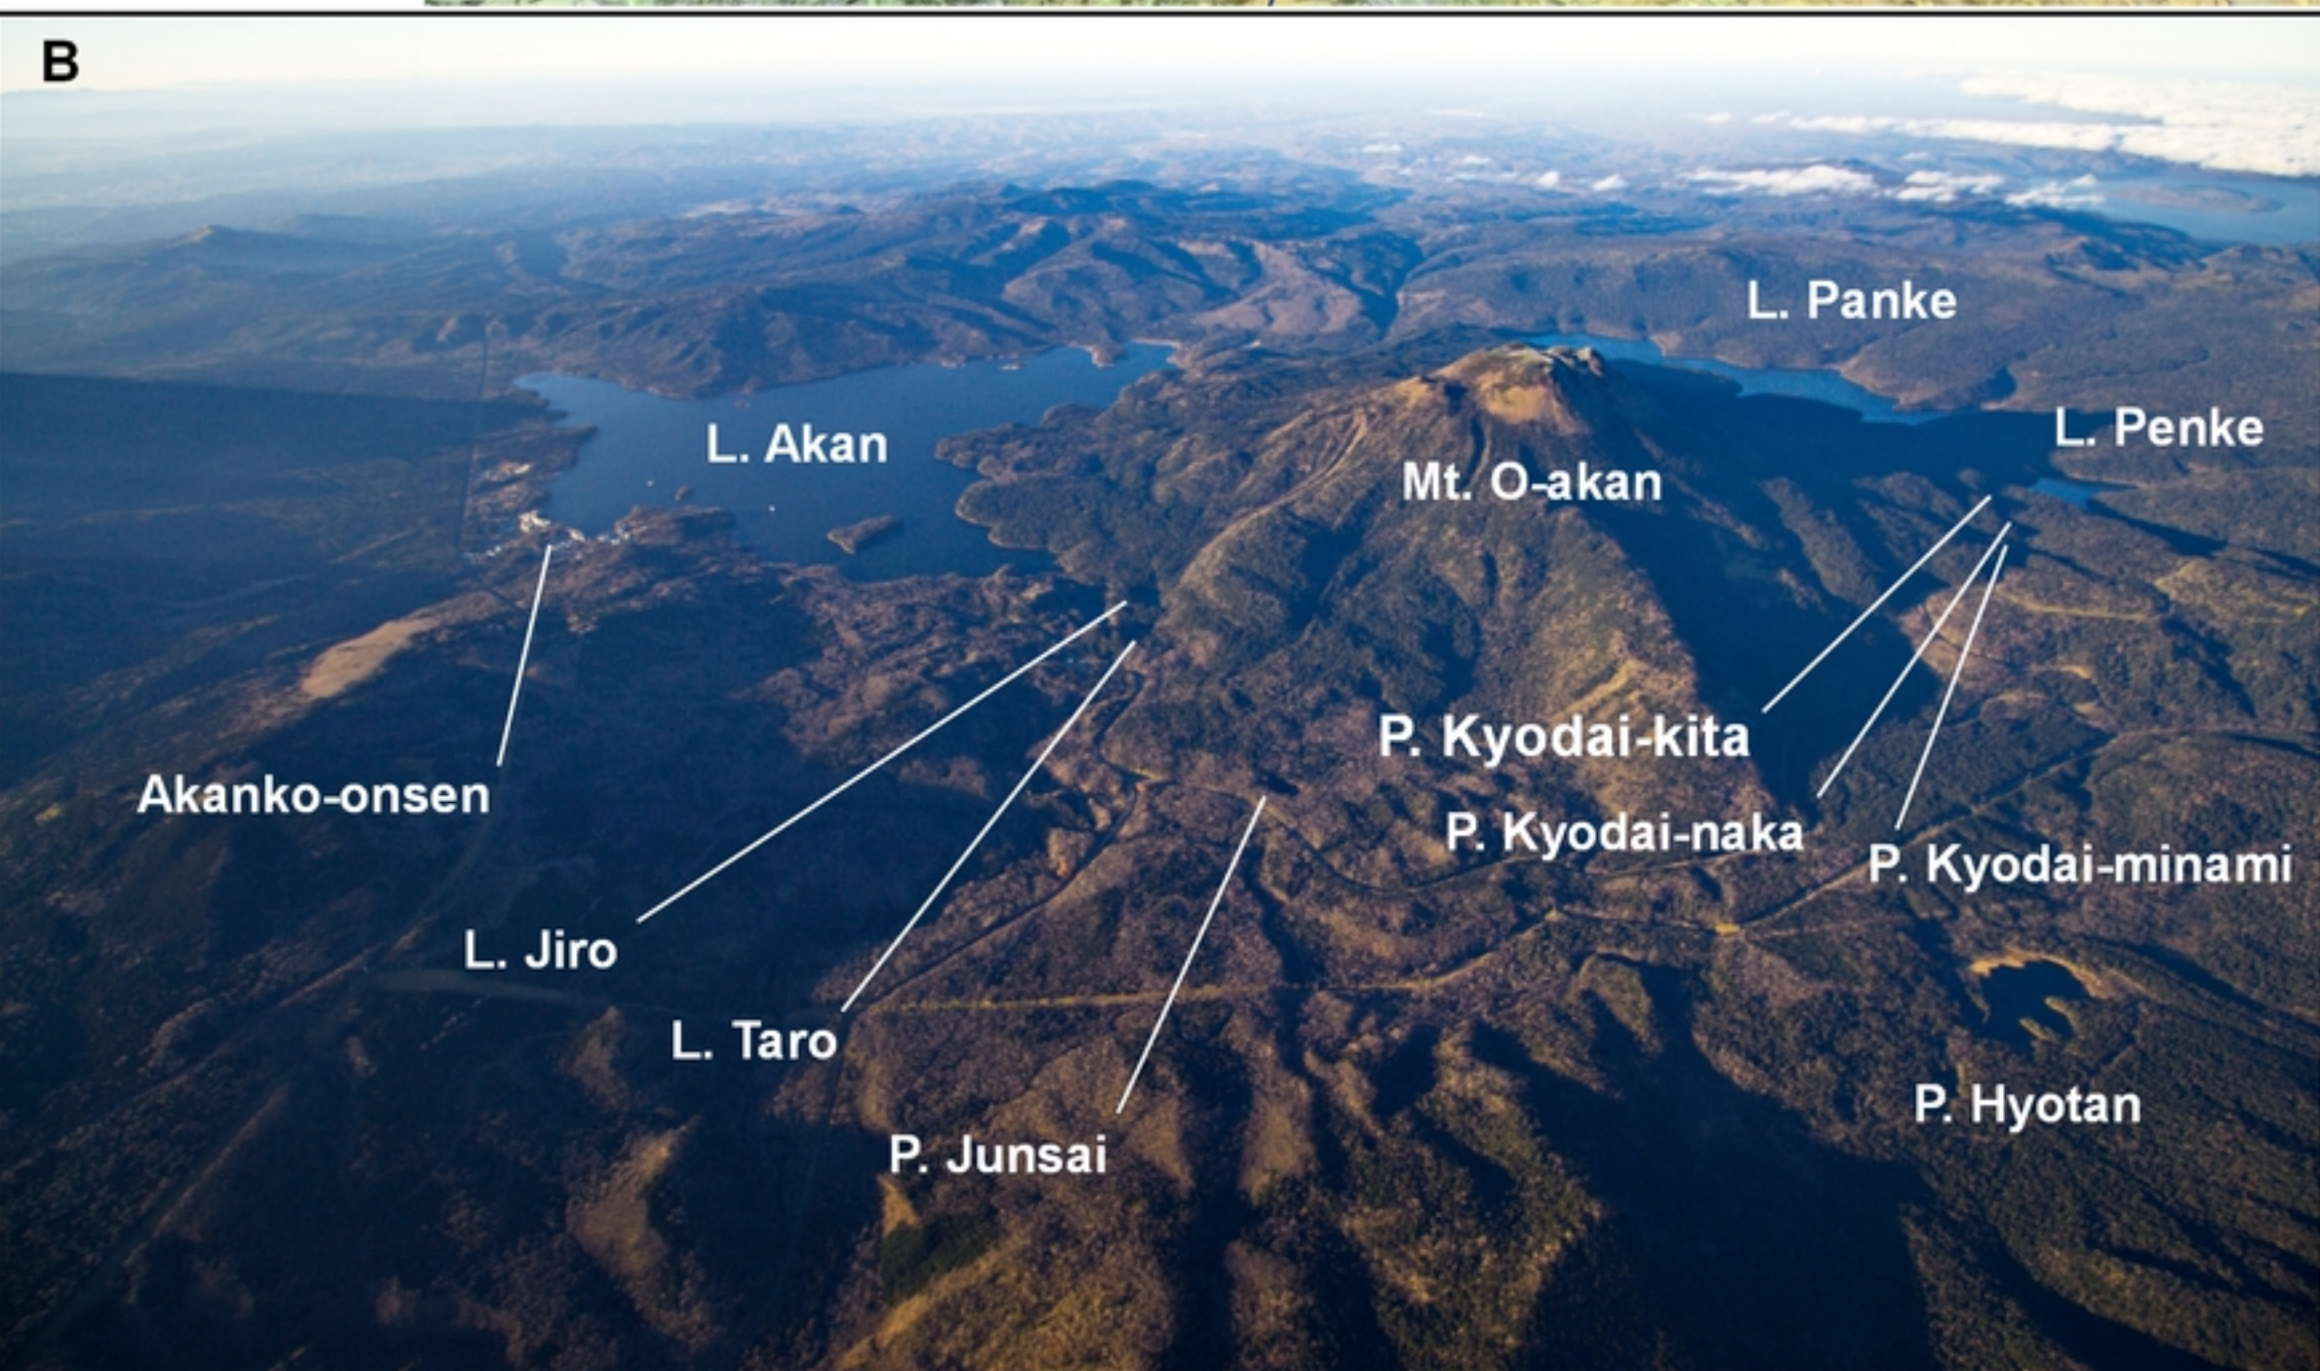

Figure



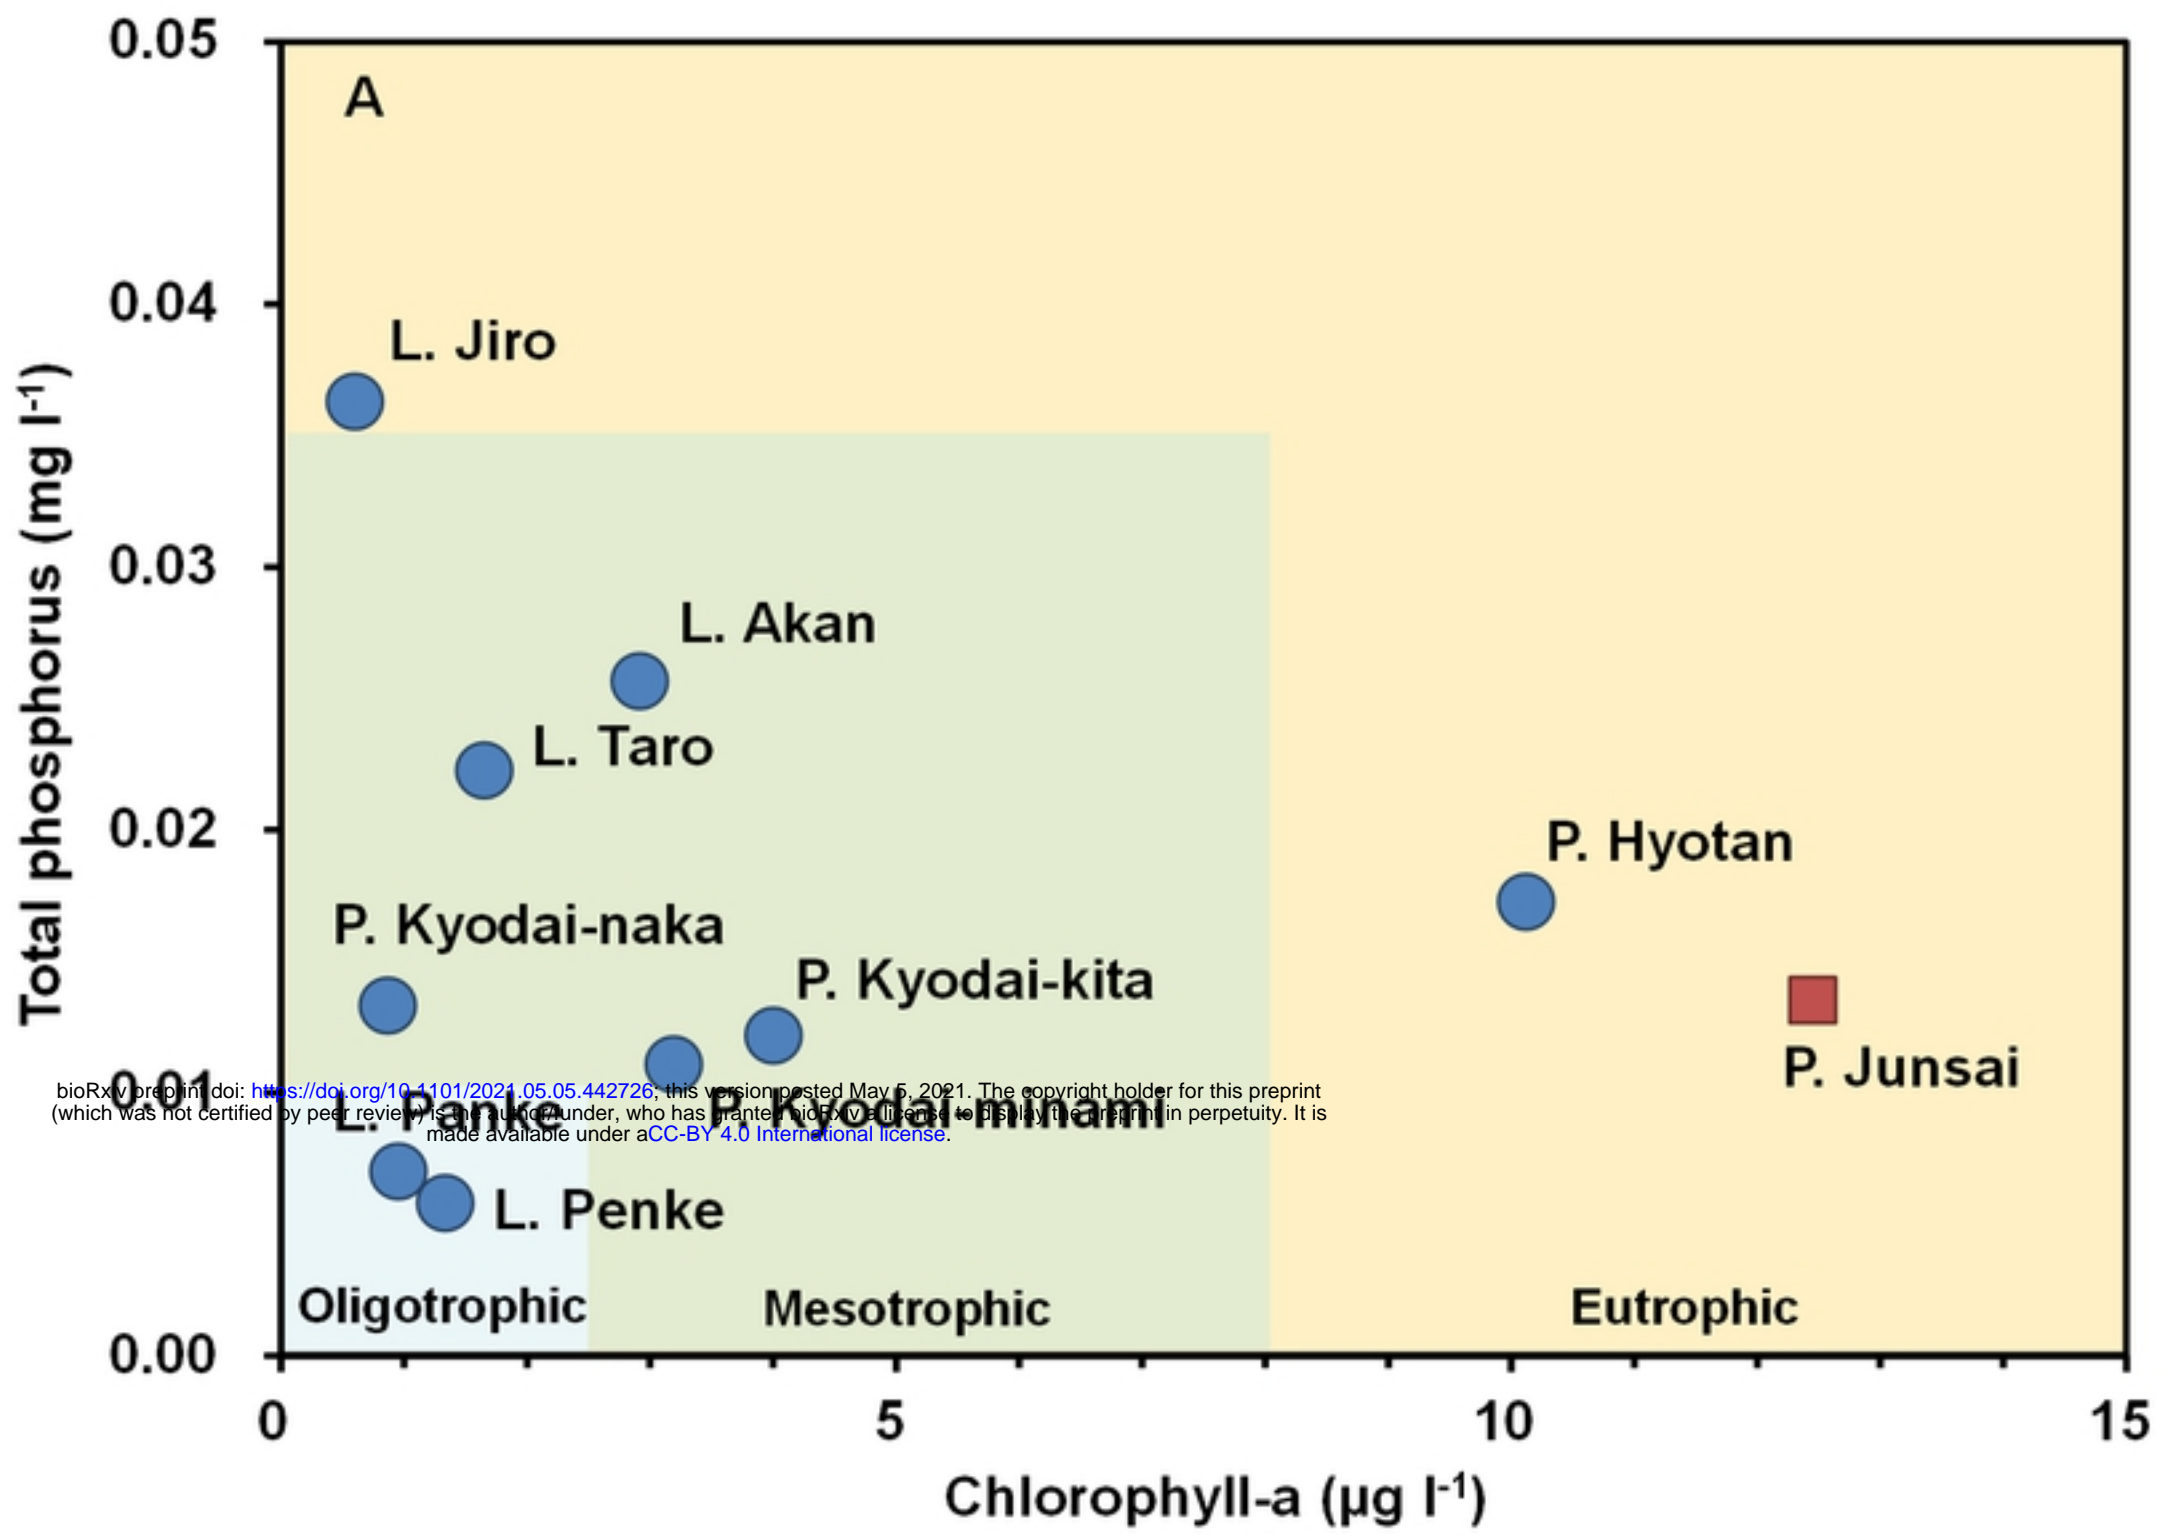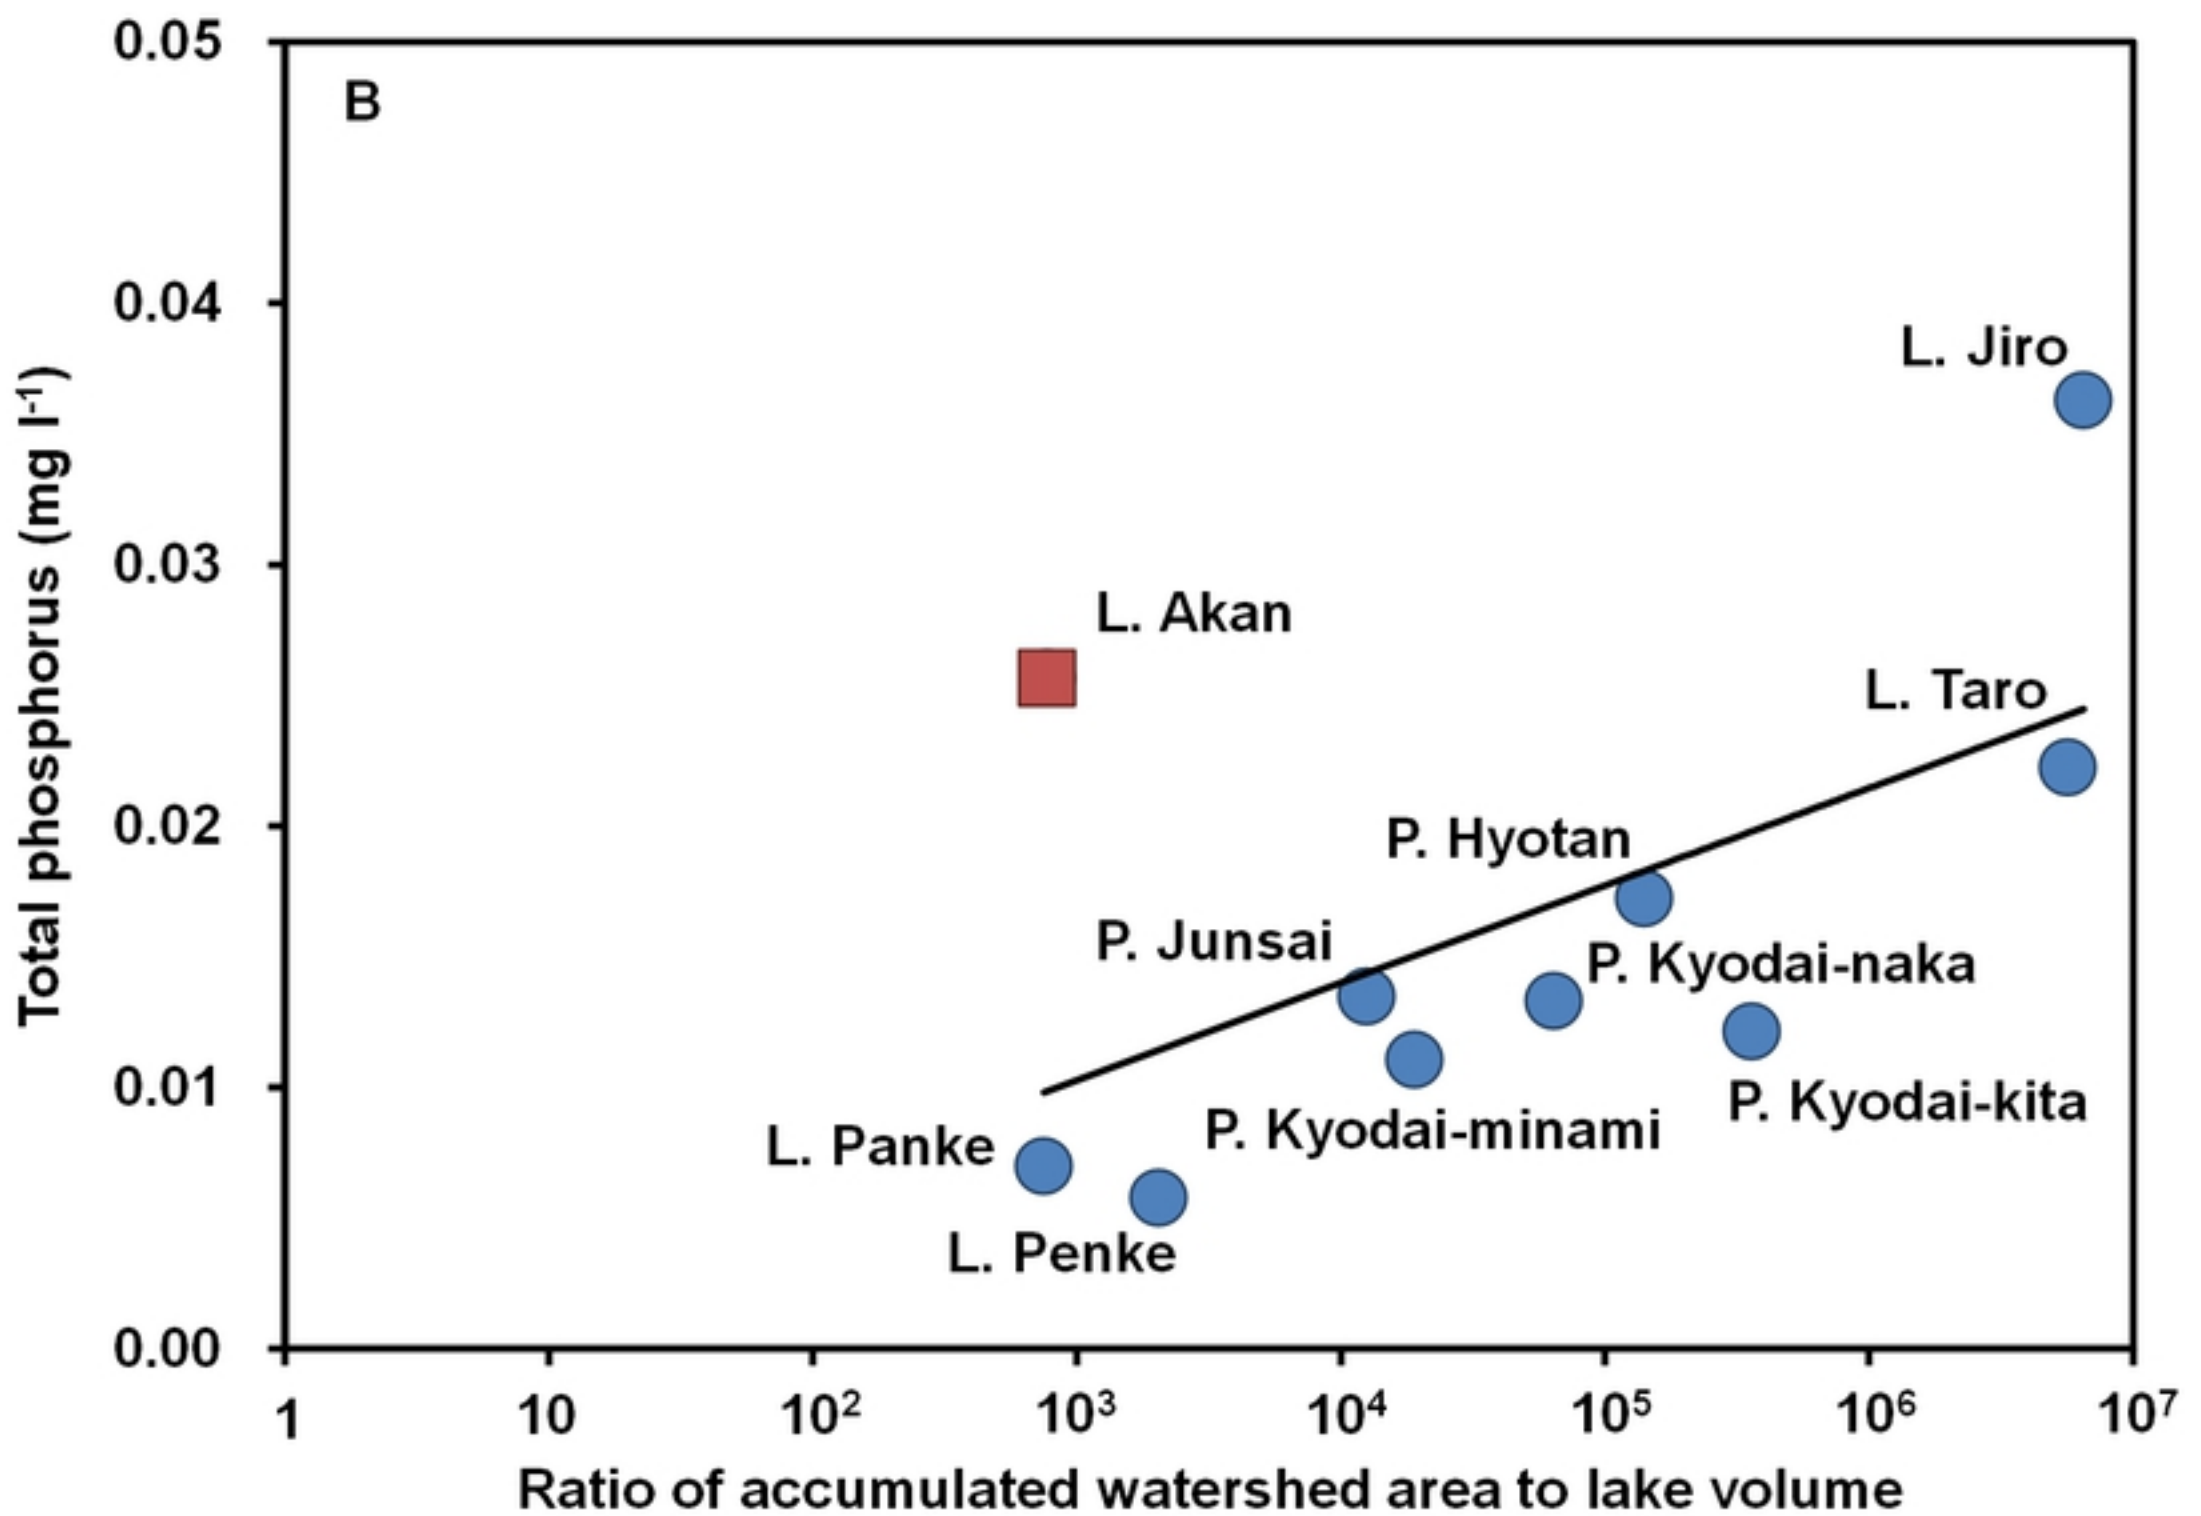

Figure

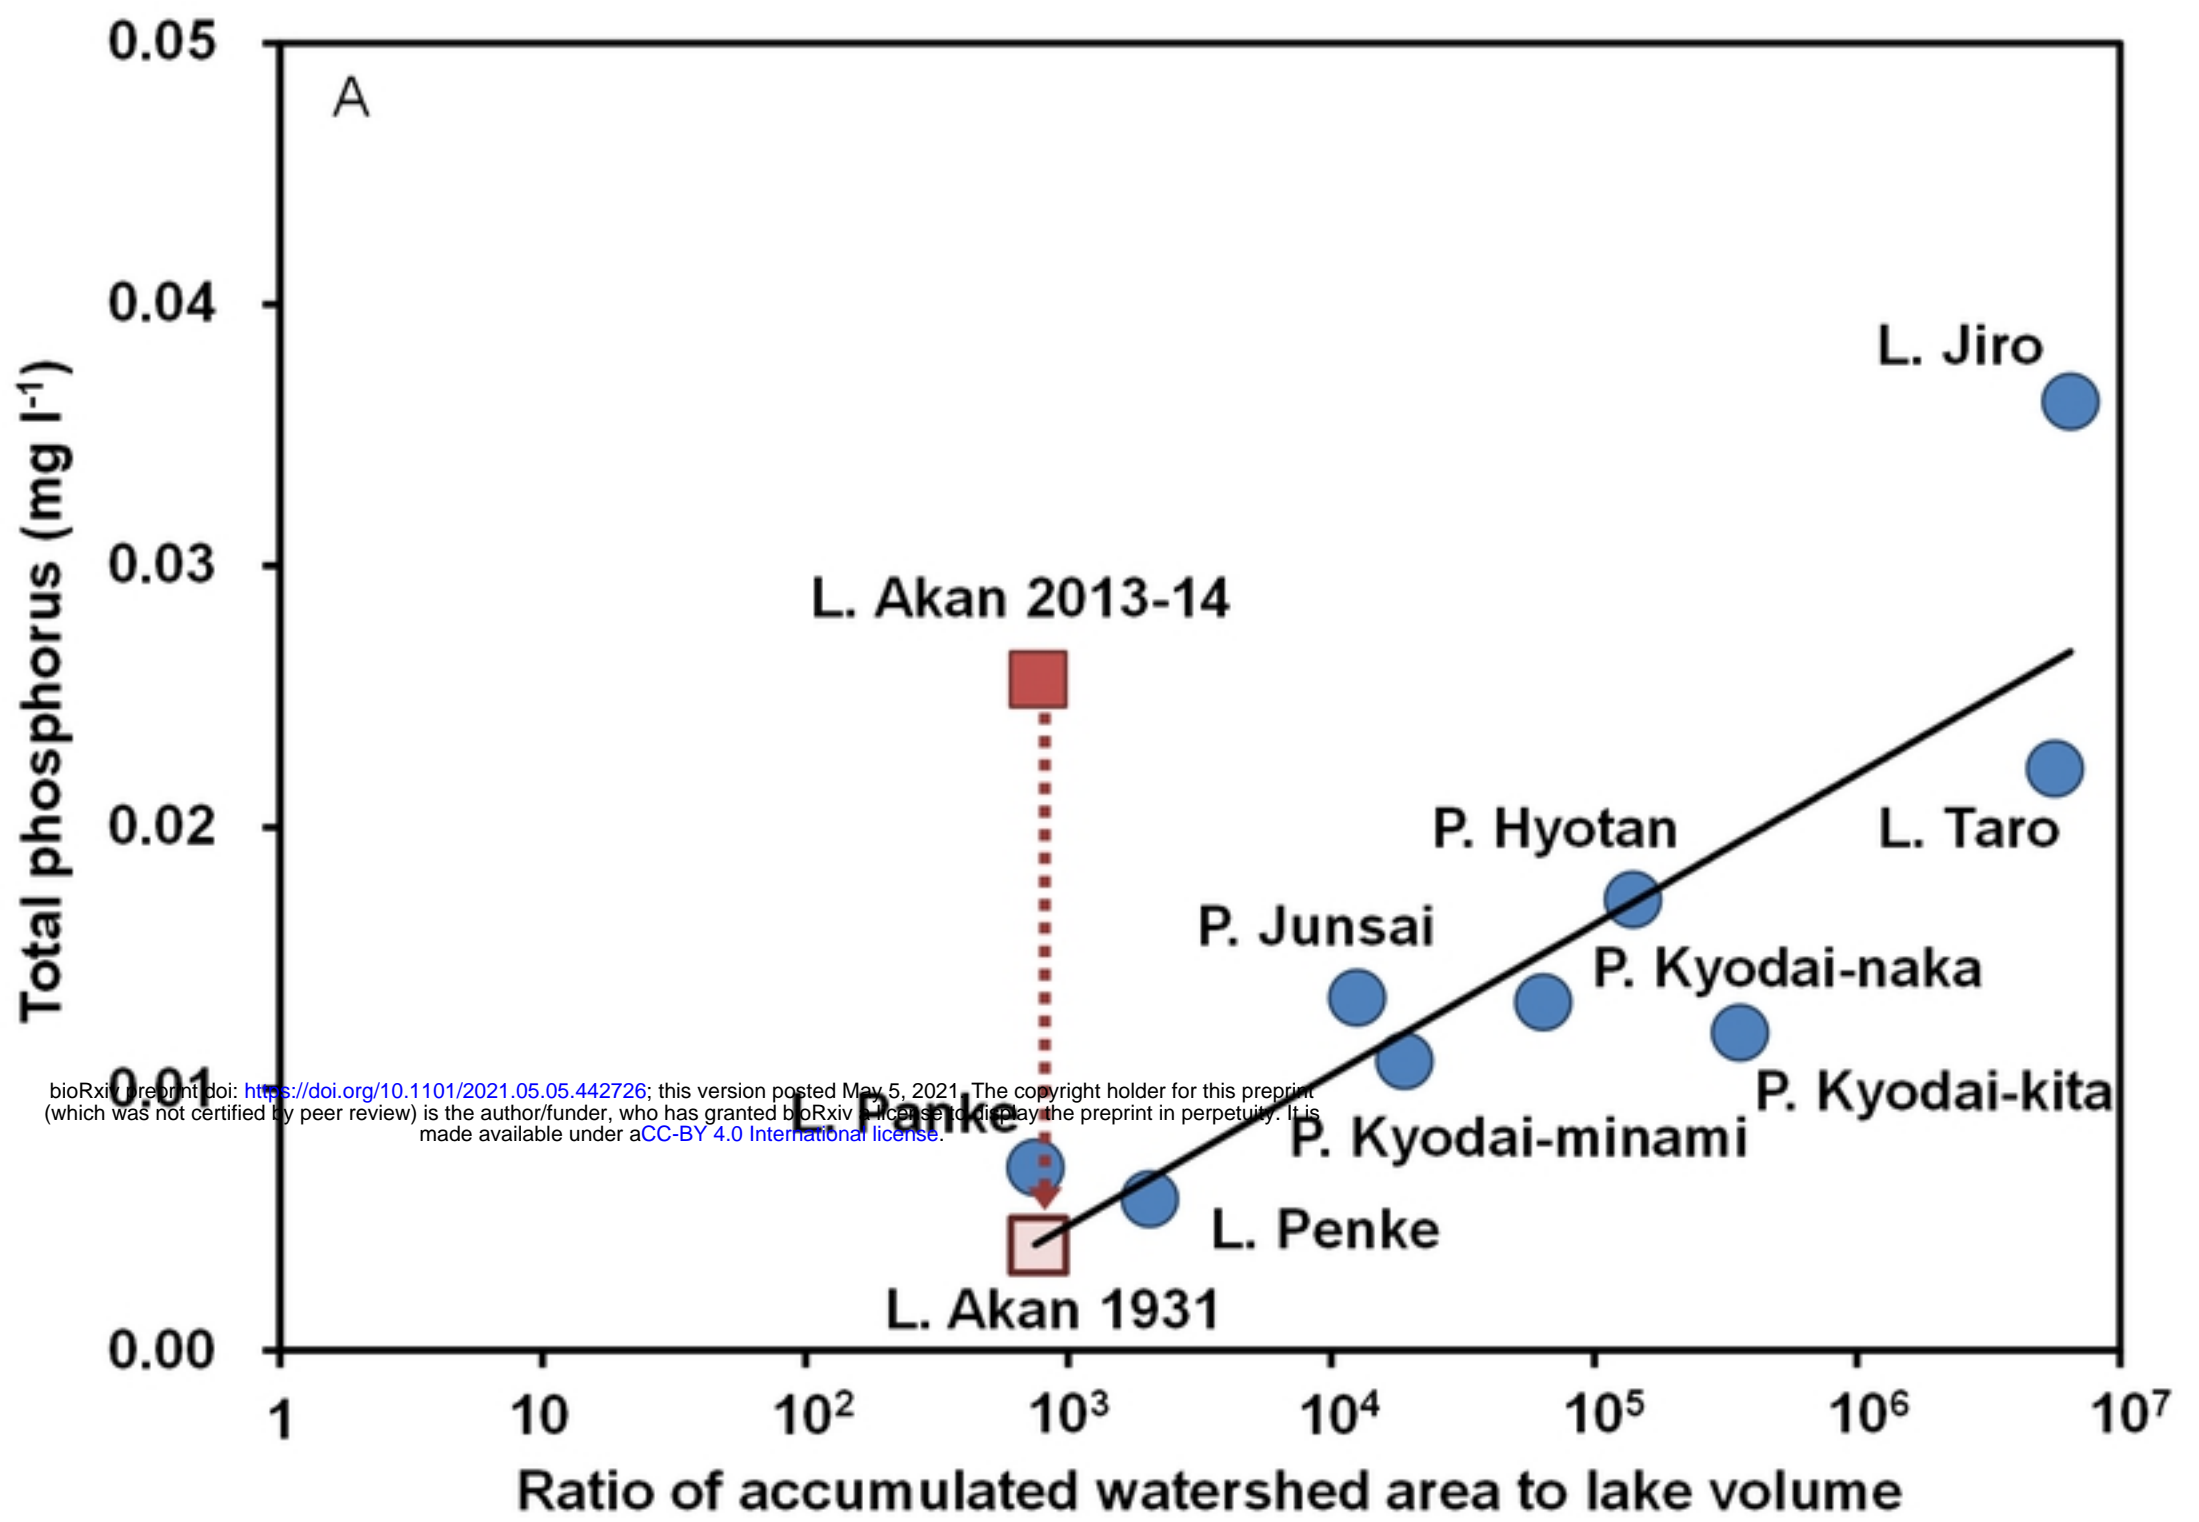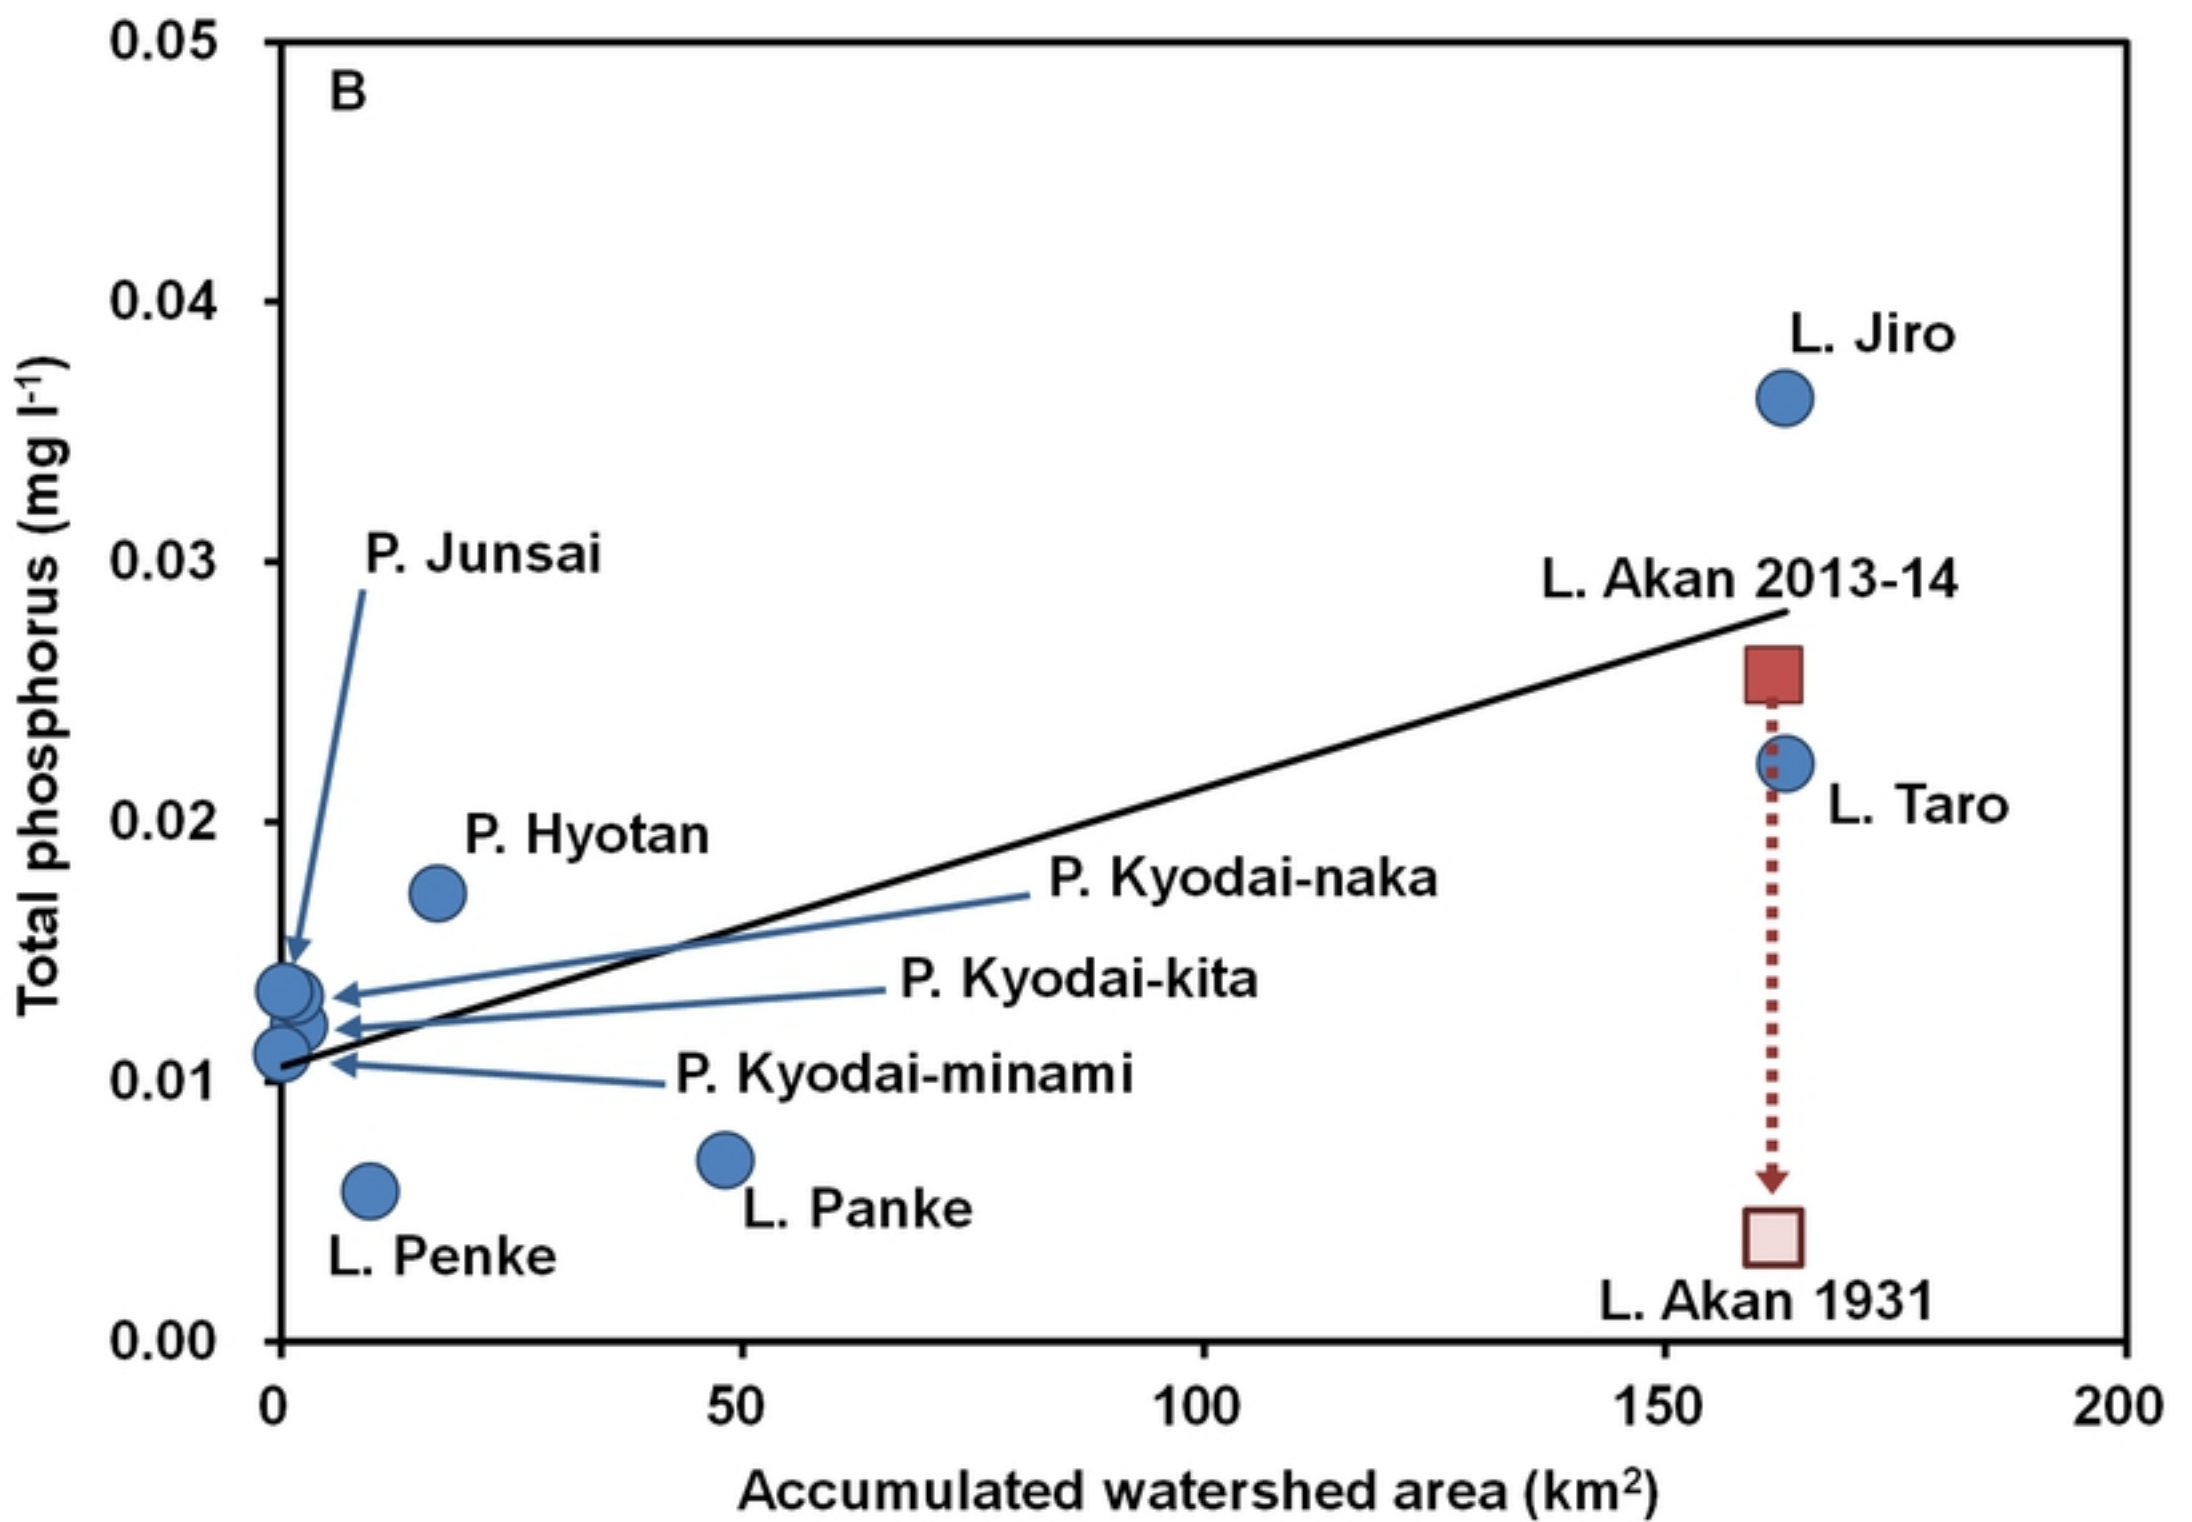

Figure



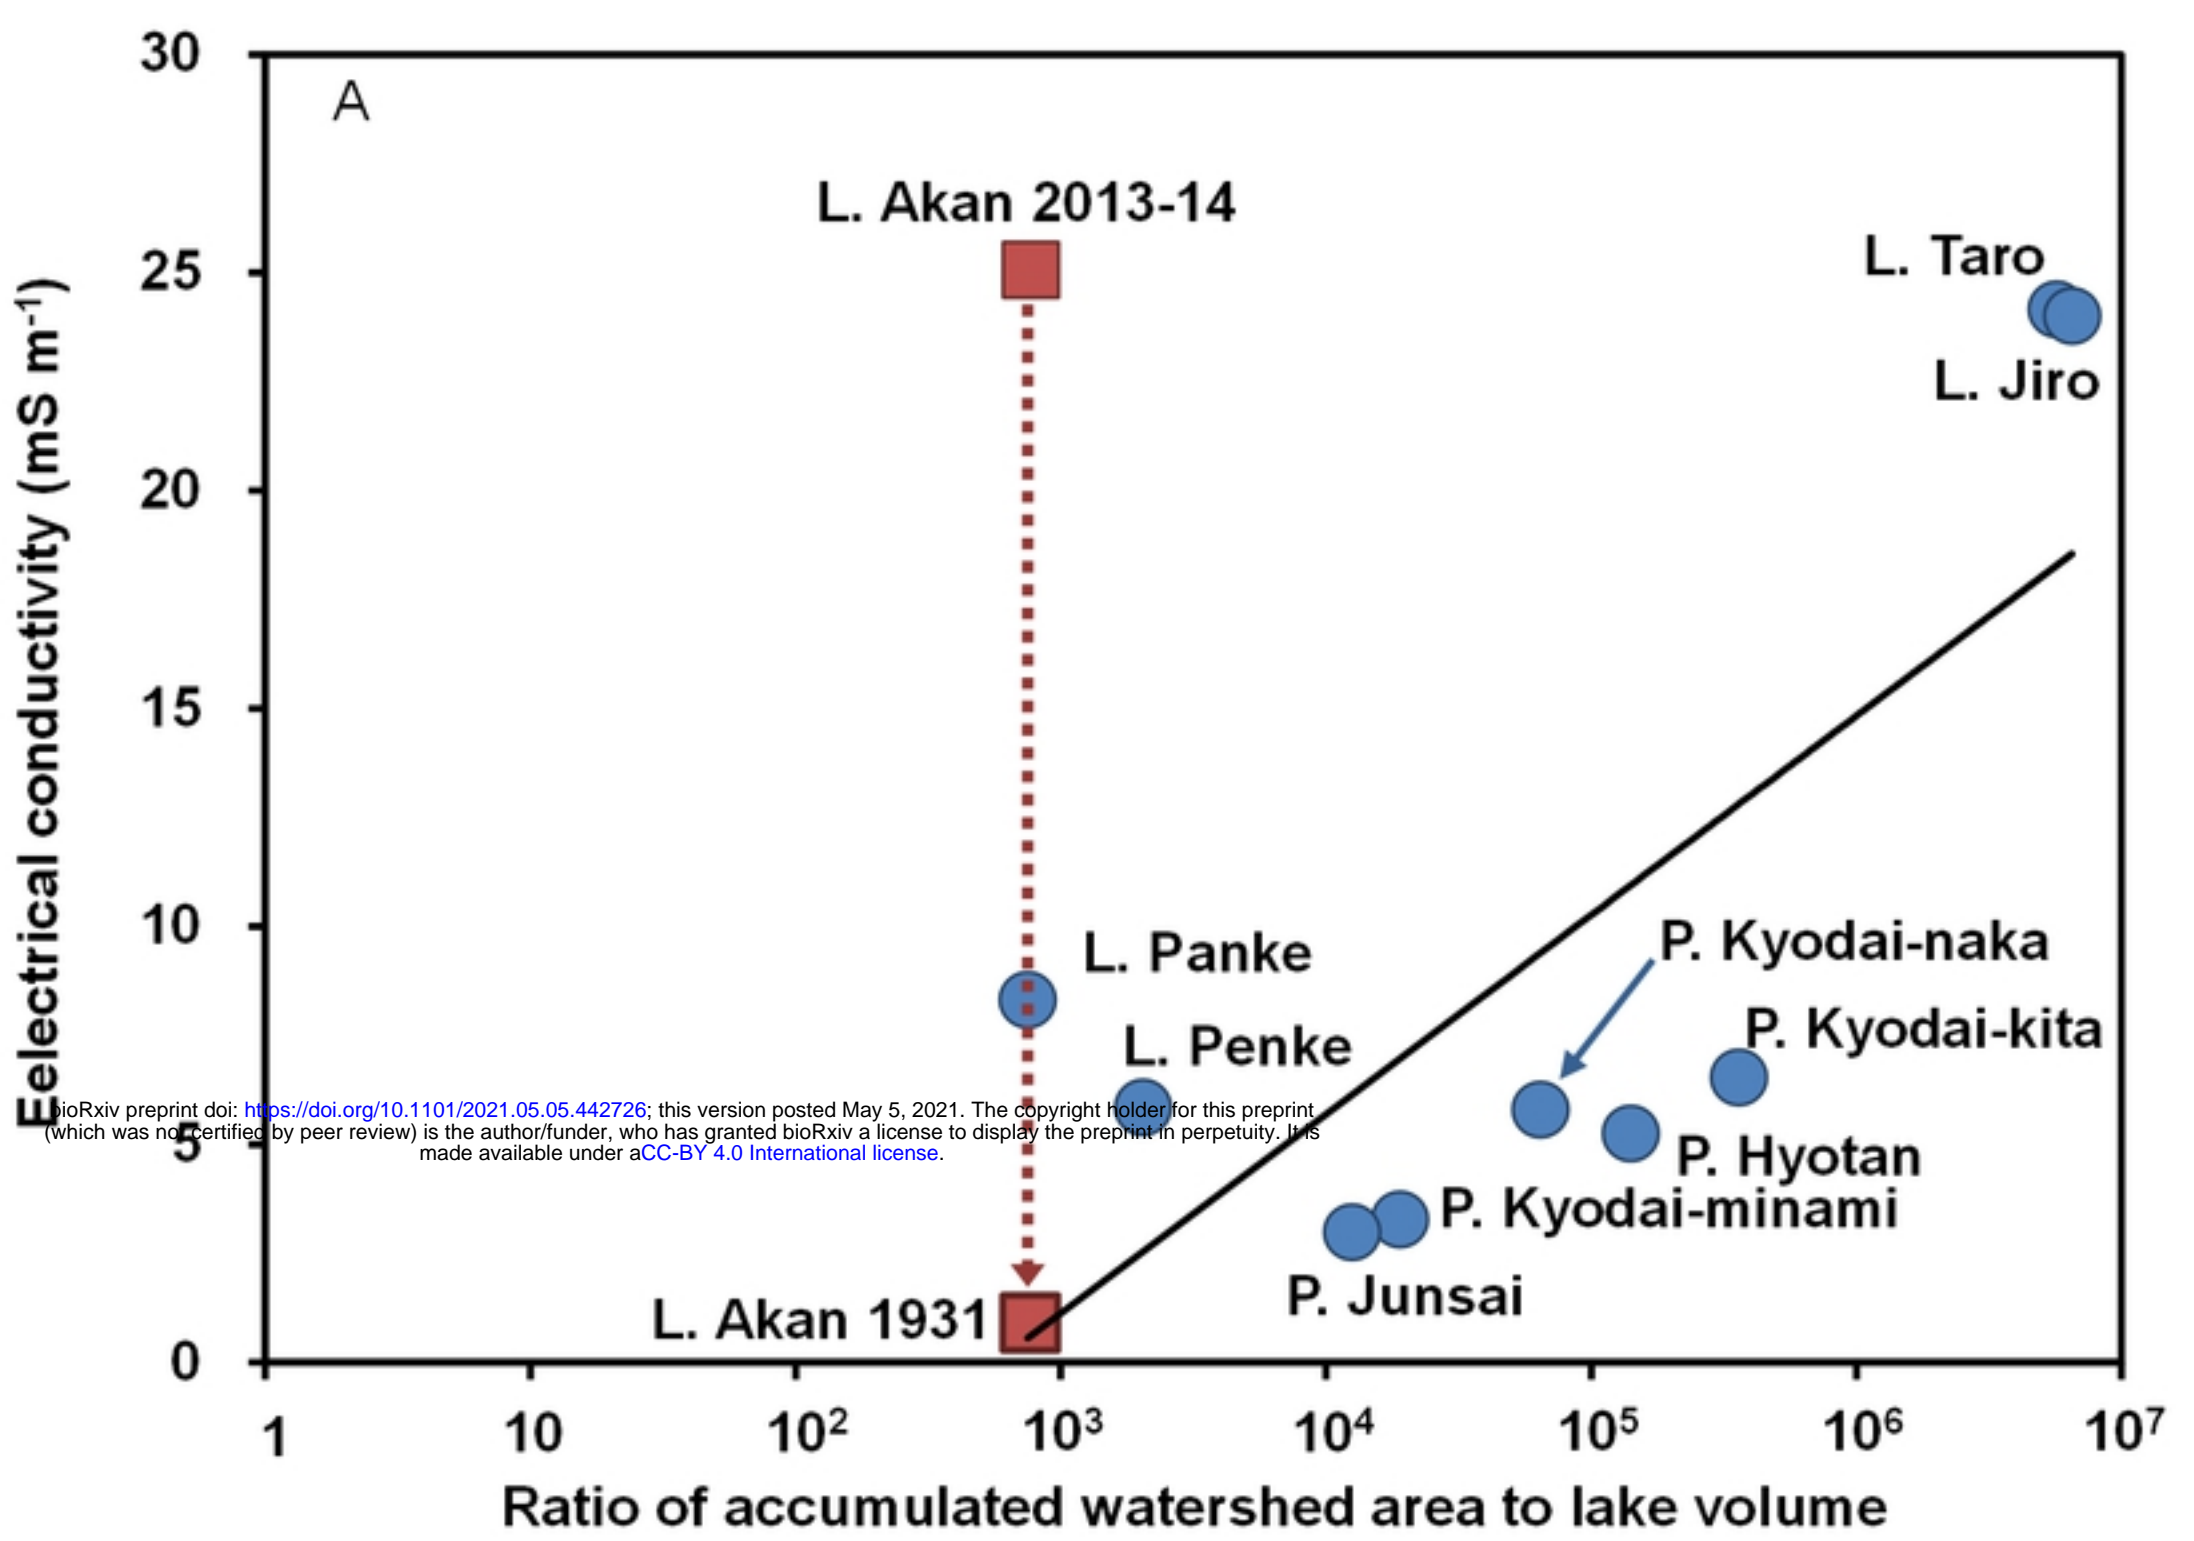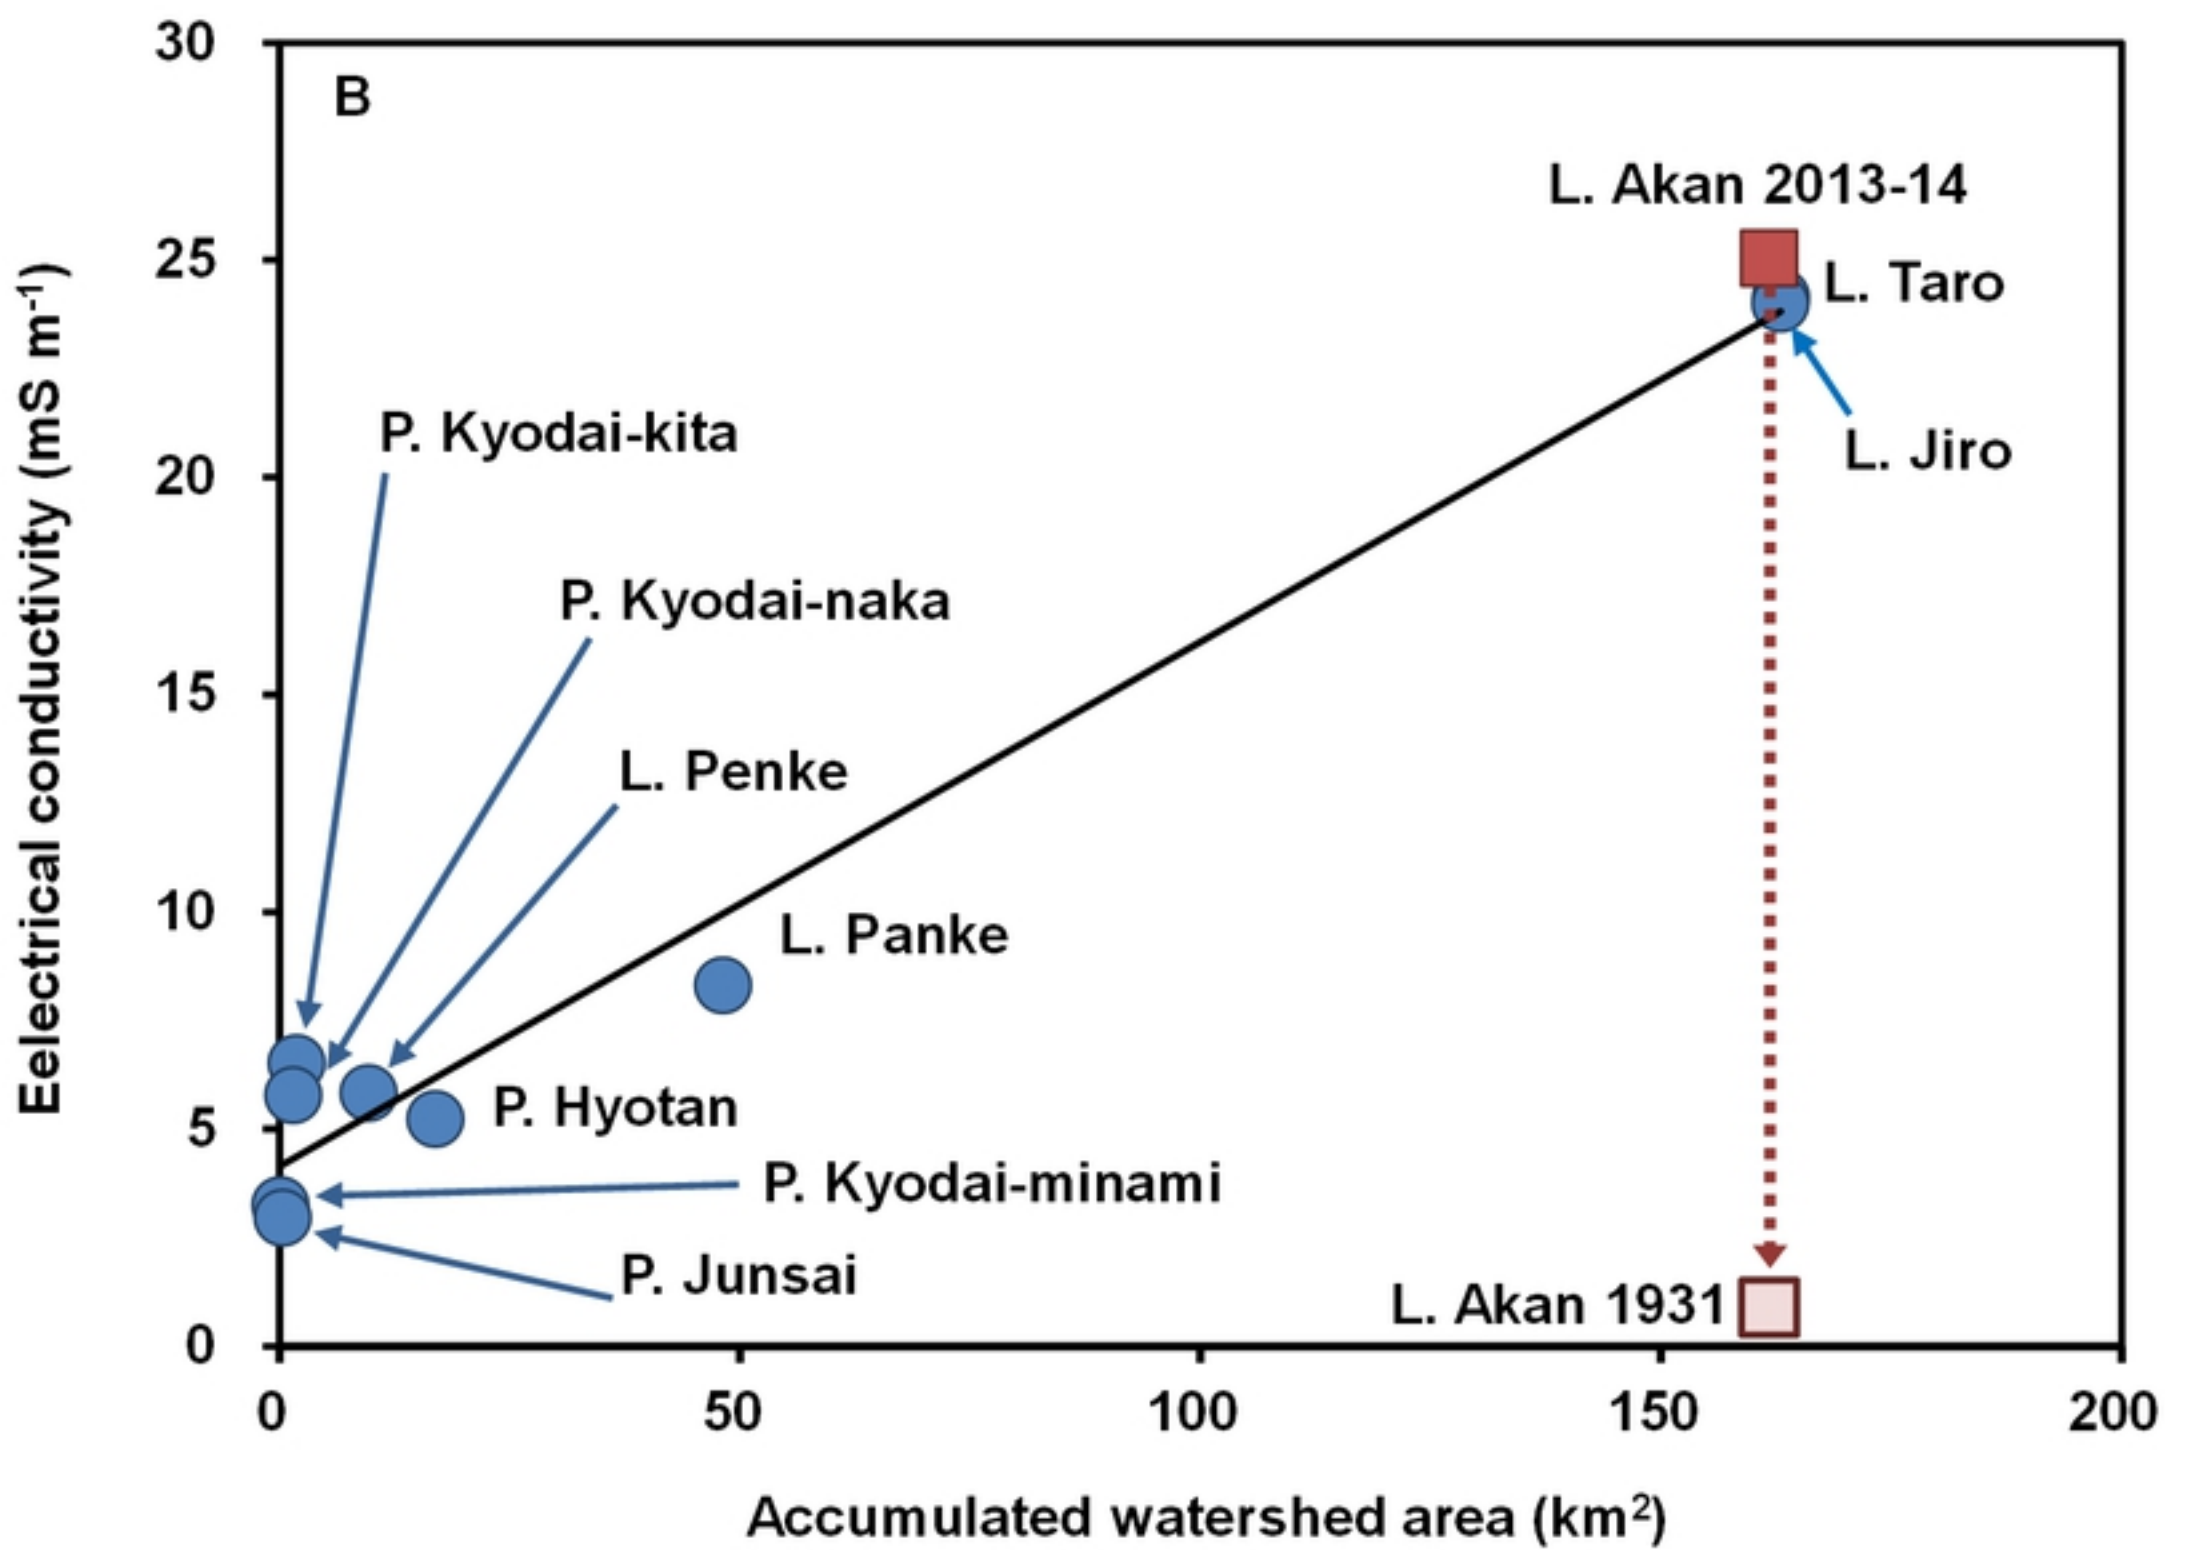

Figure

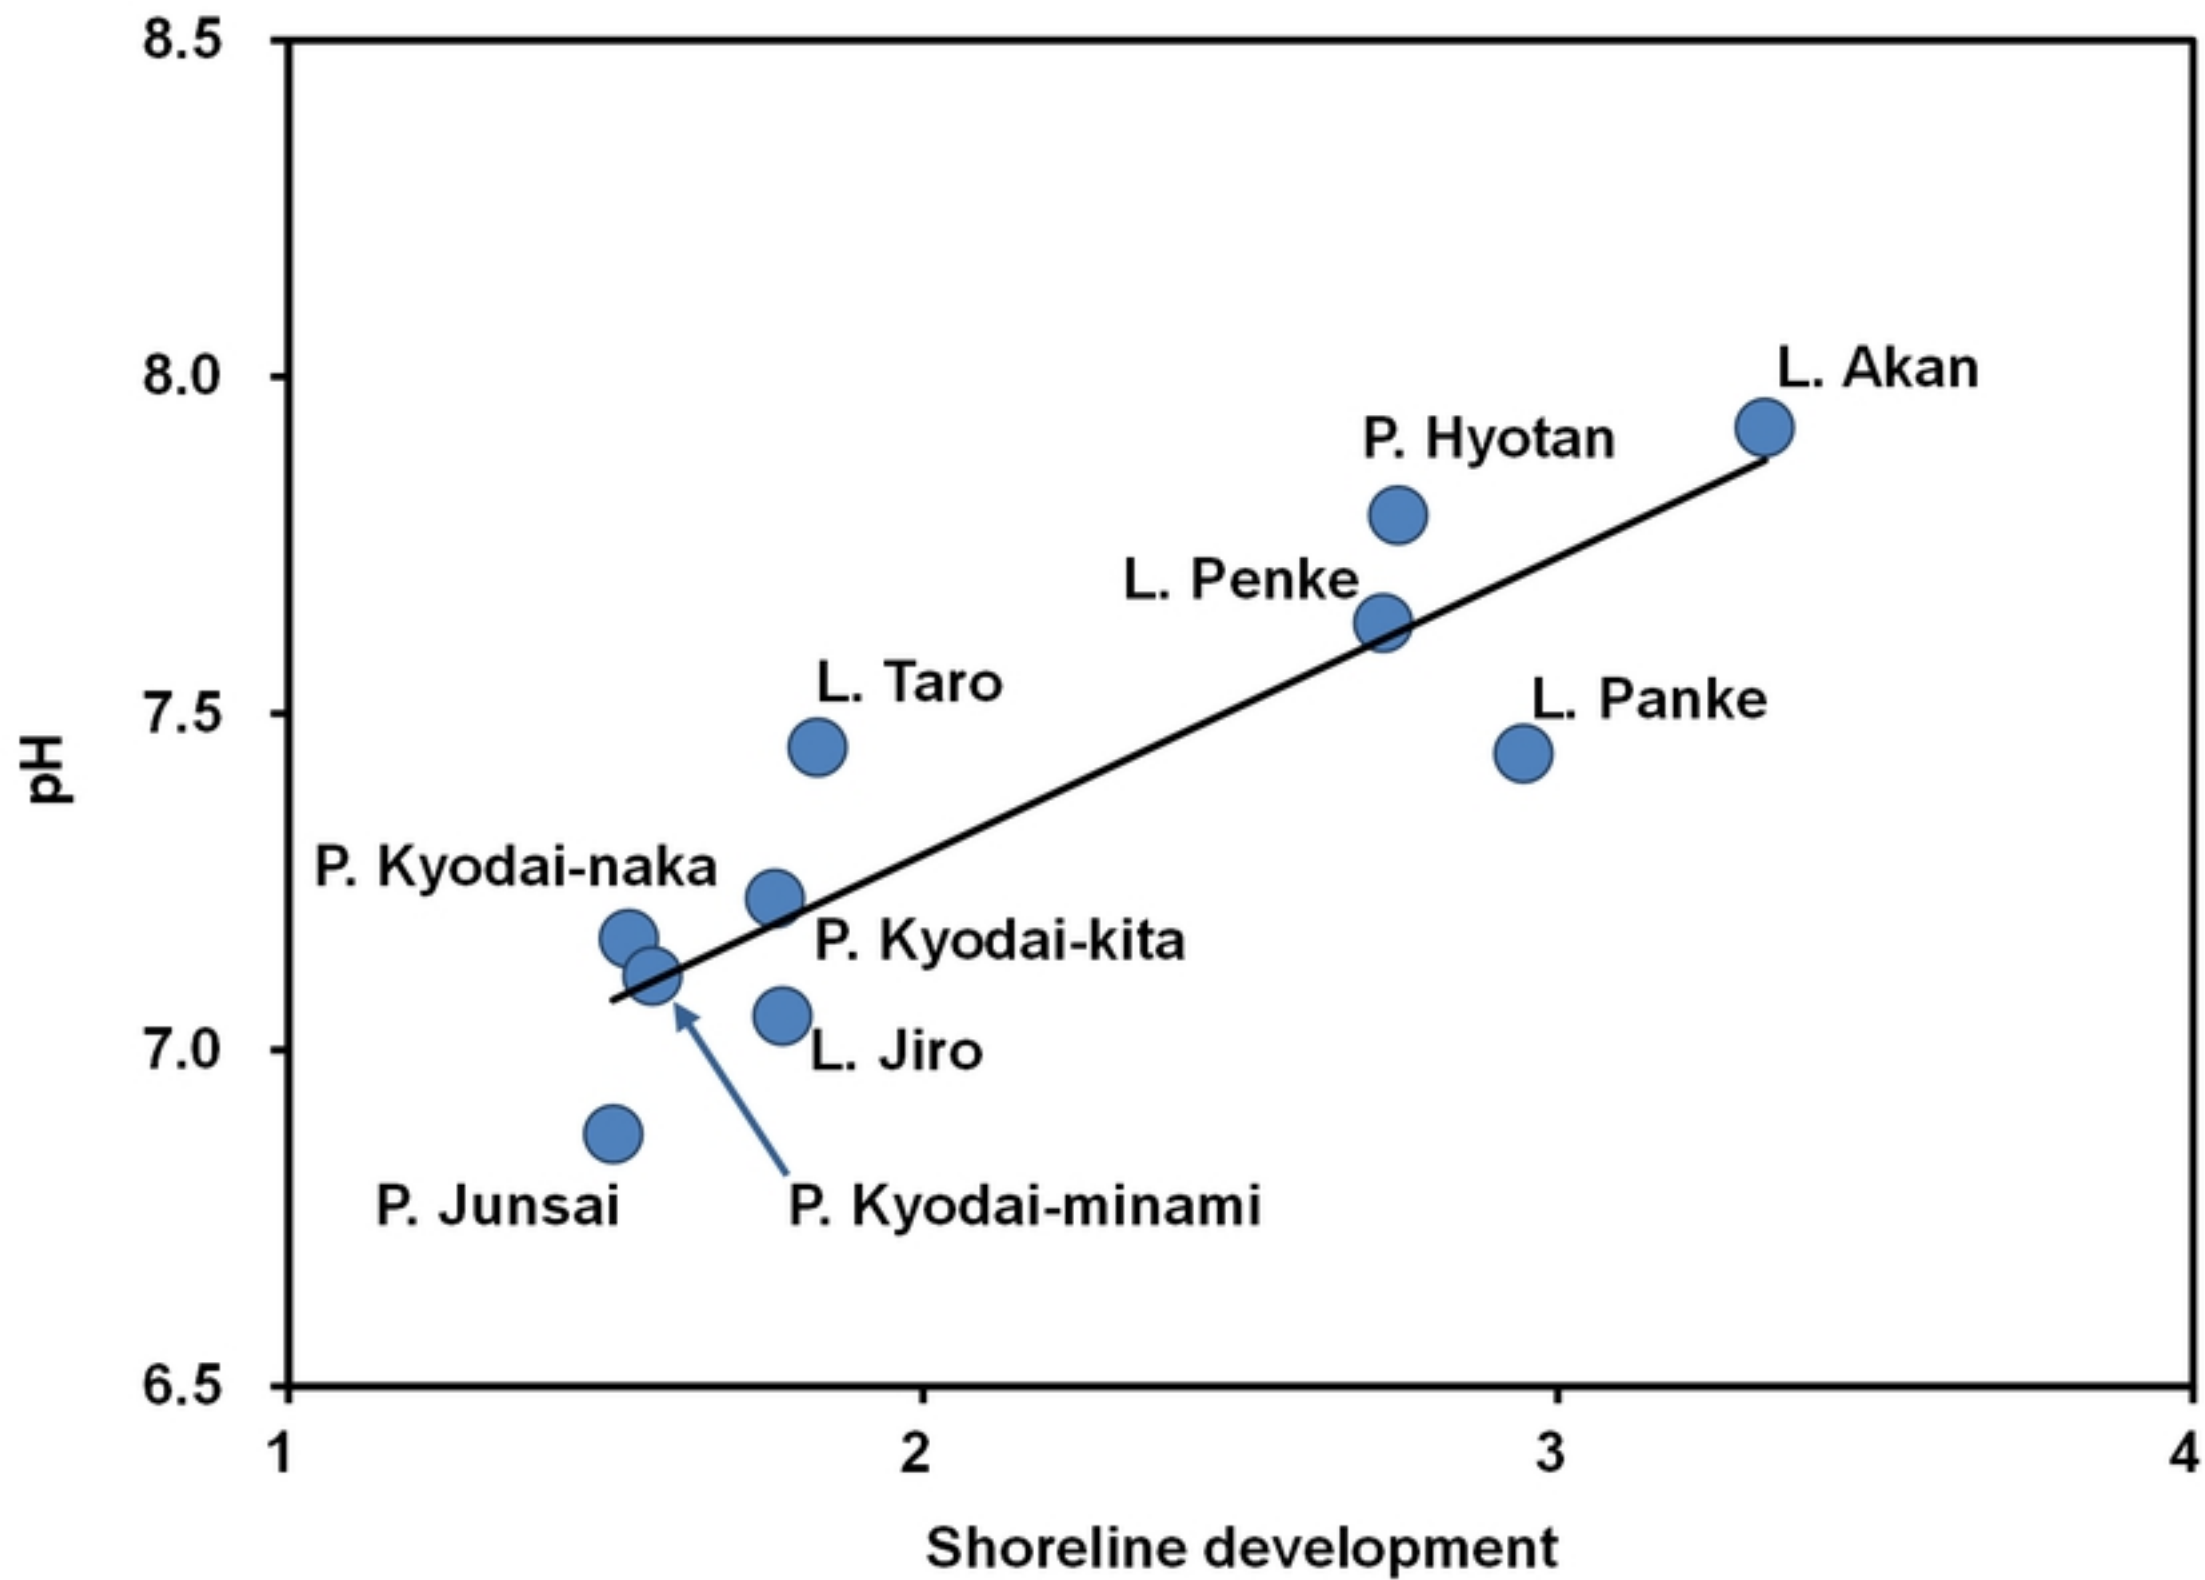

Figure

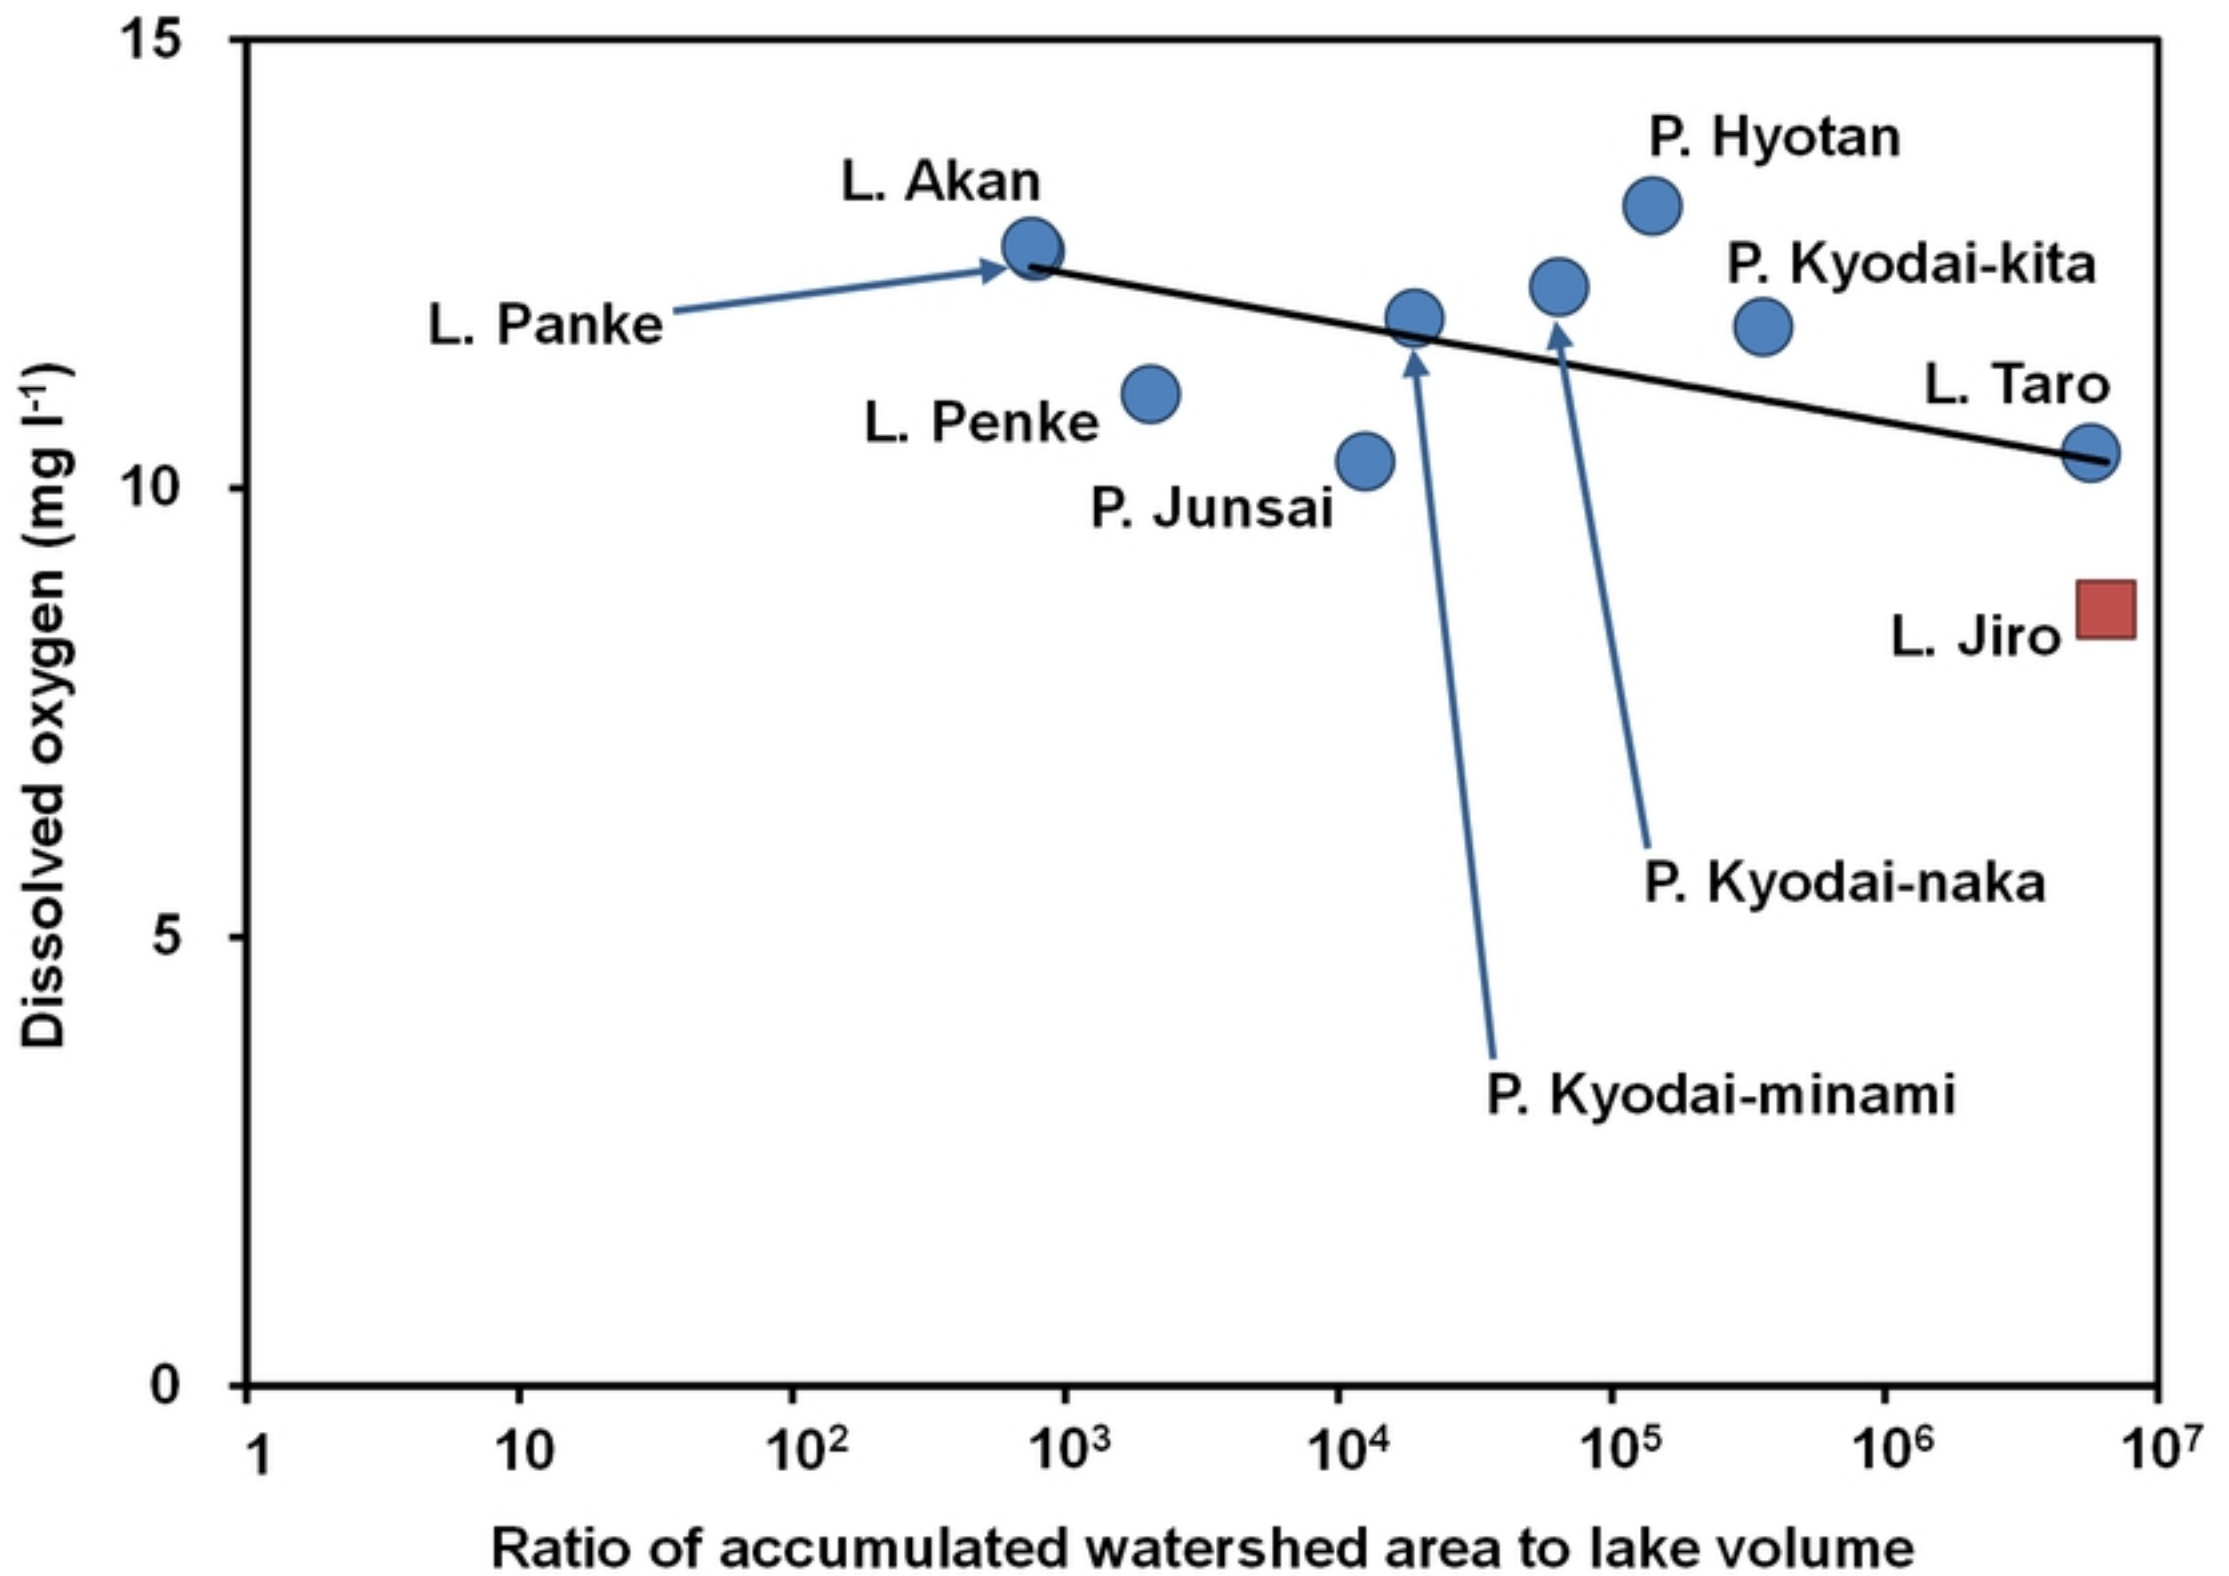

Figure

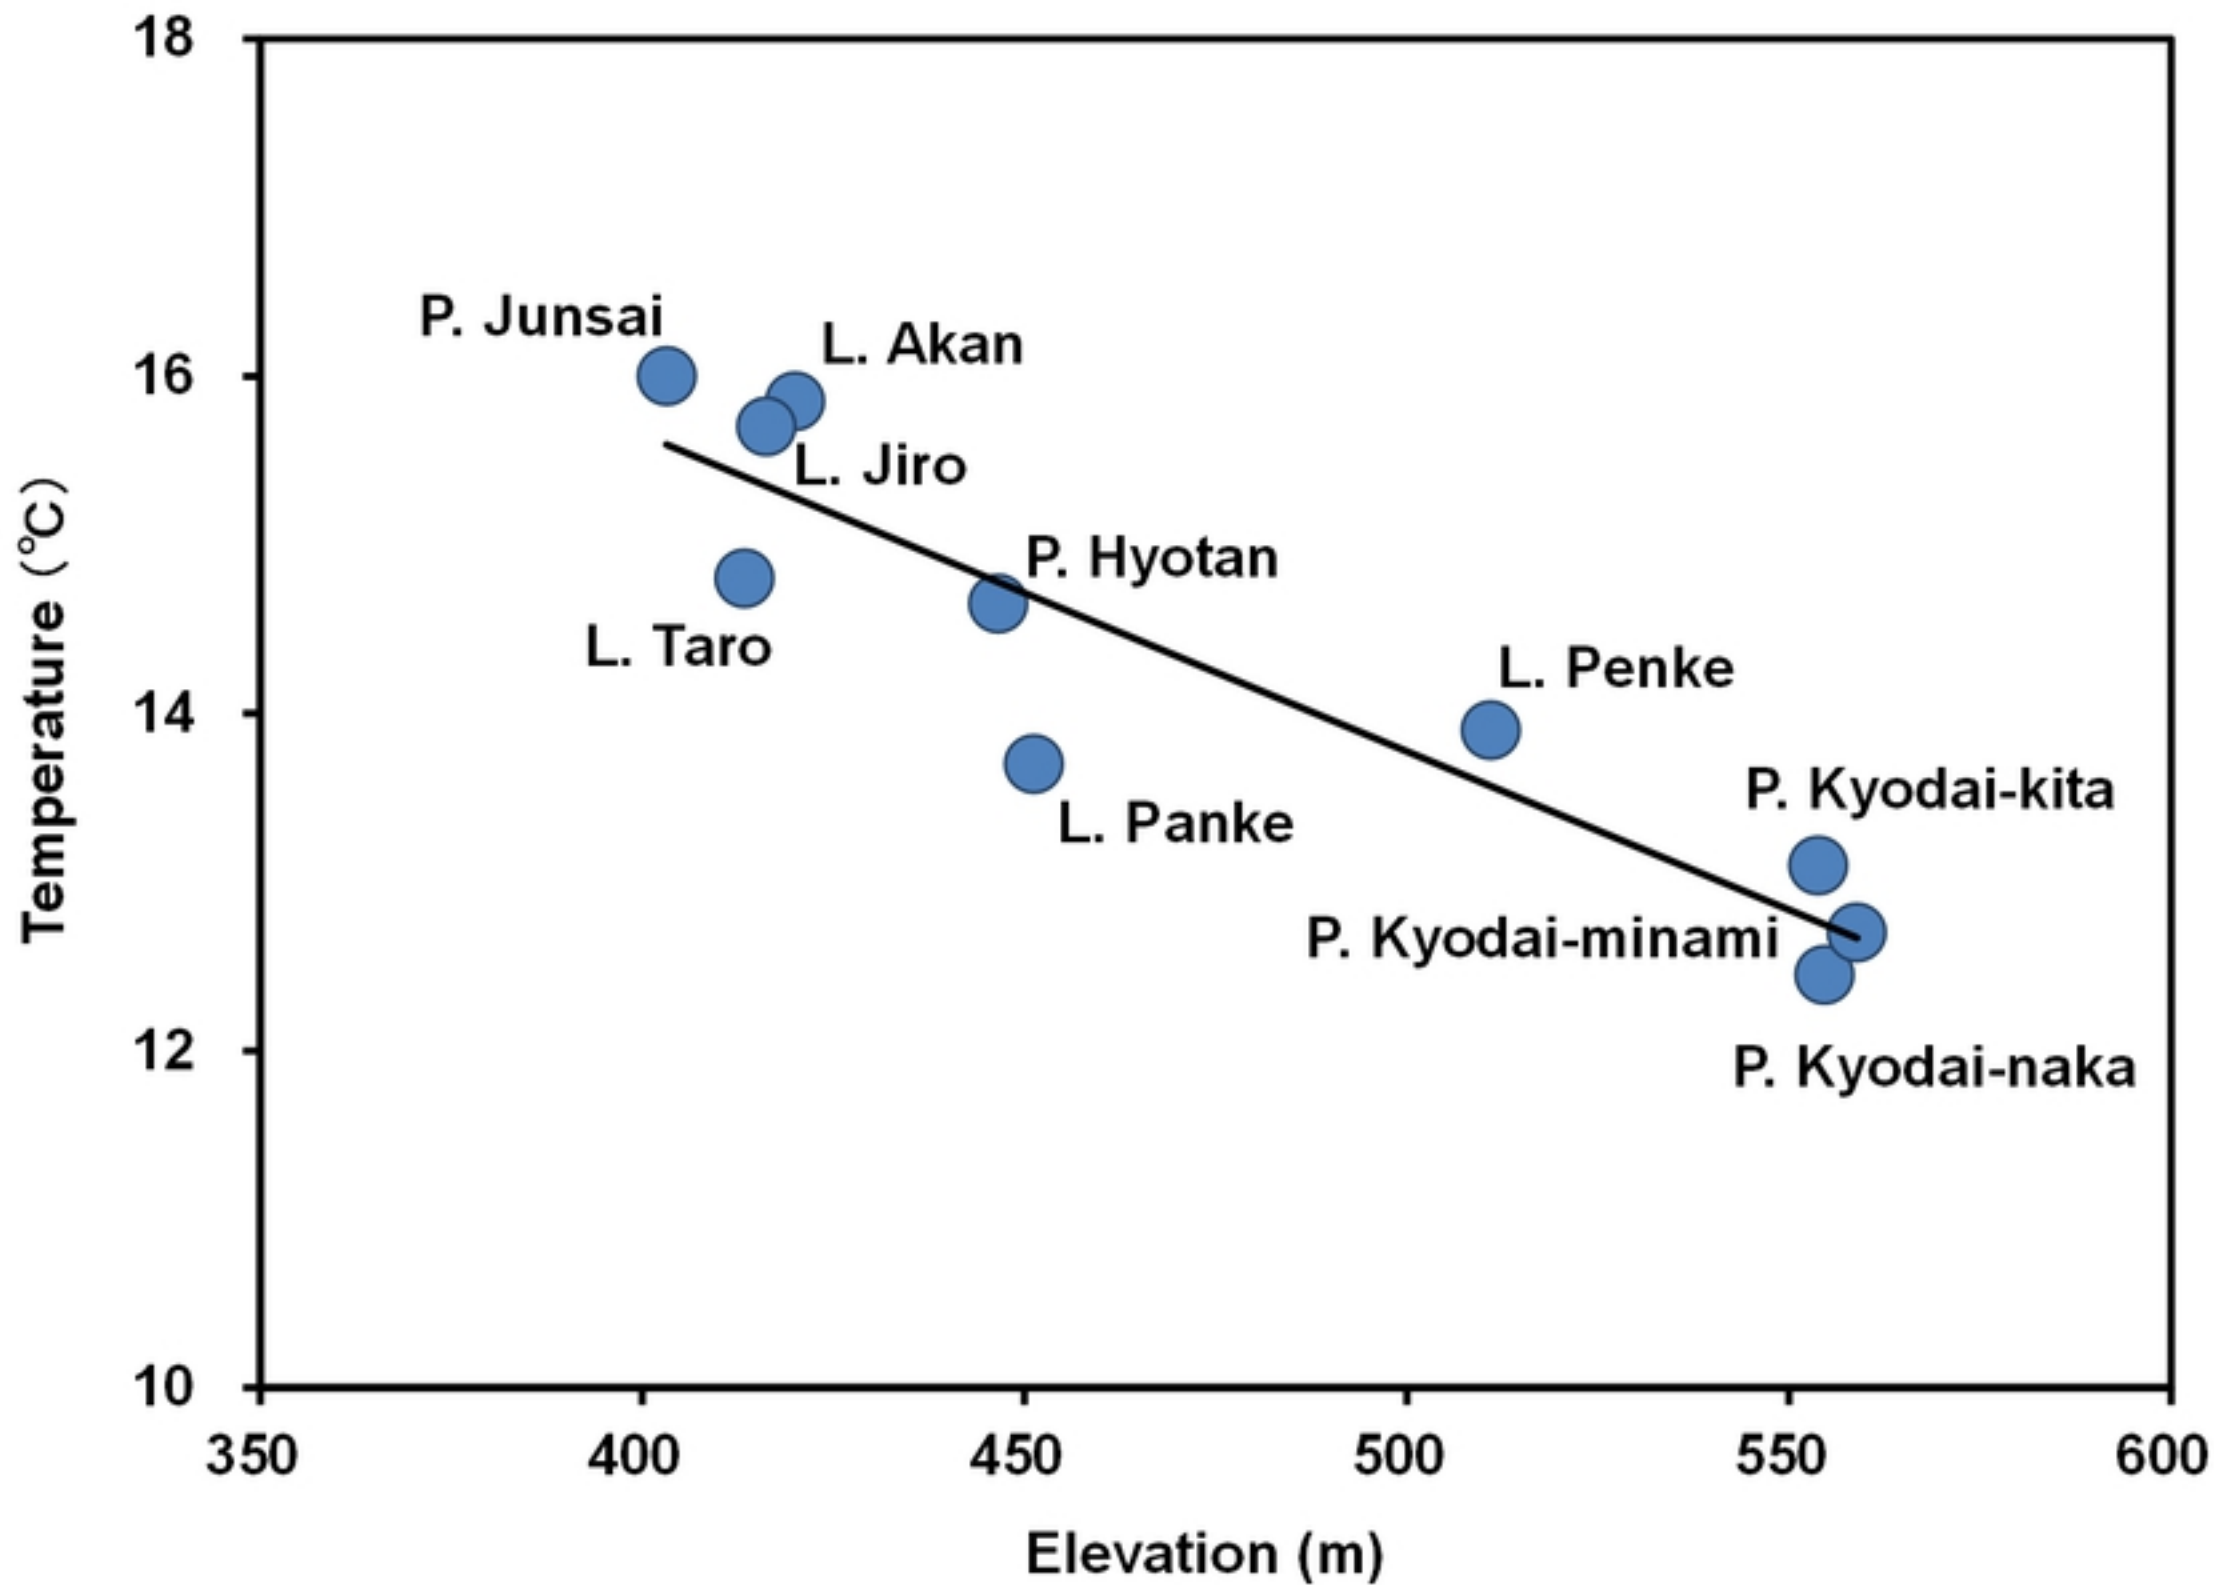

Figure

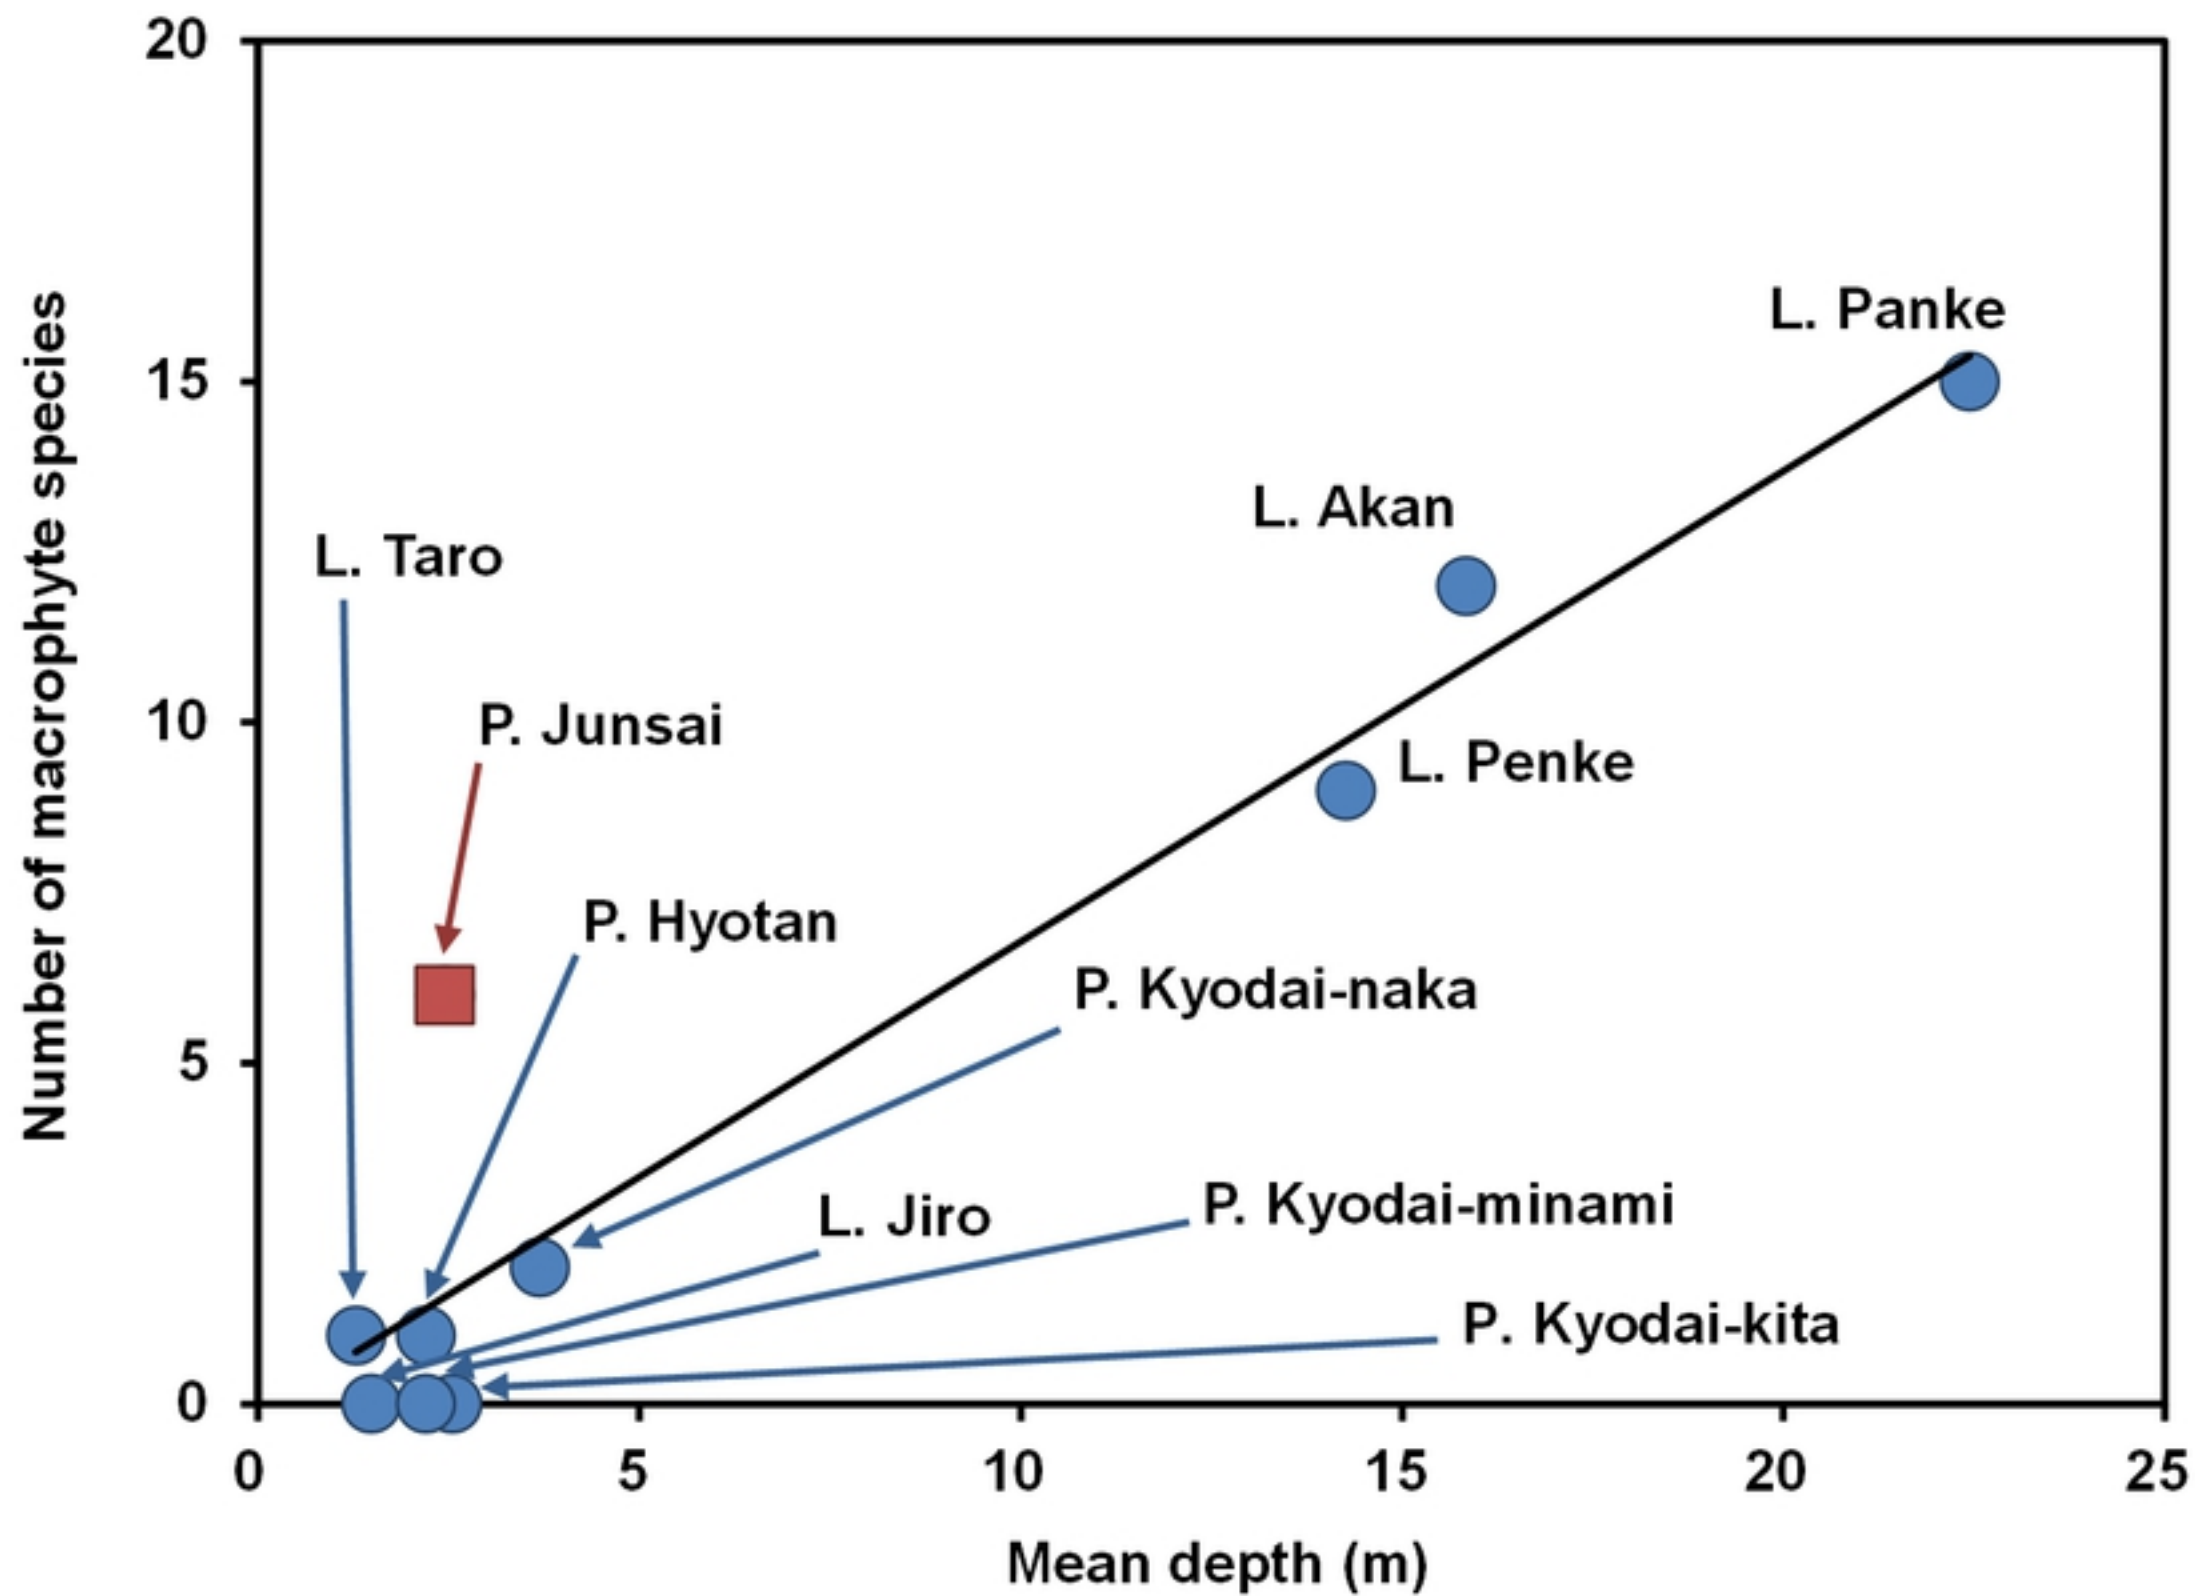

Figure

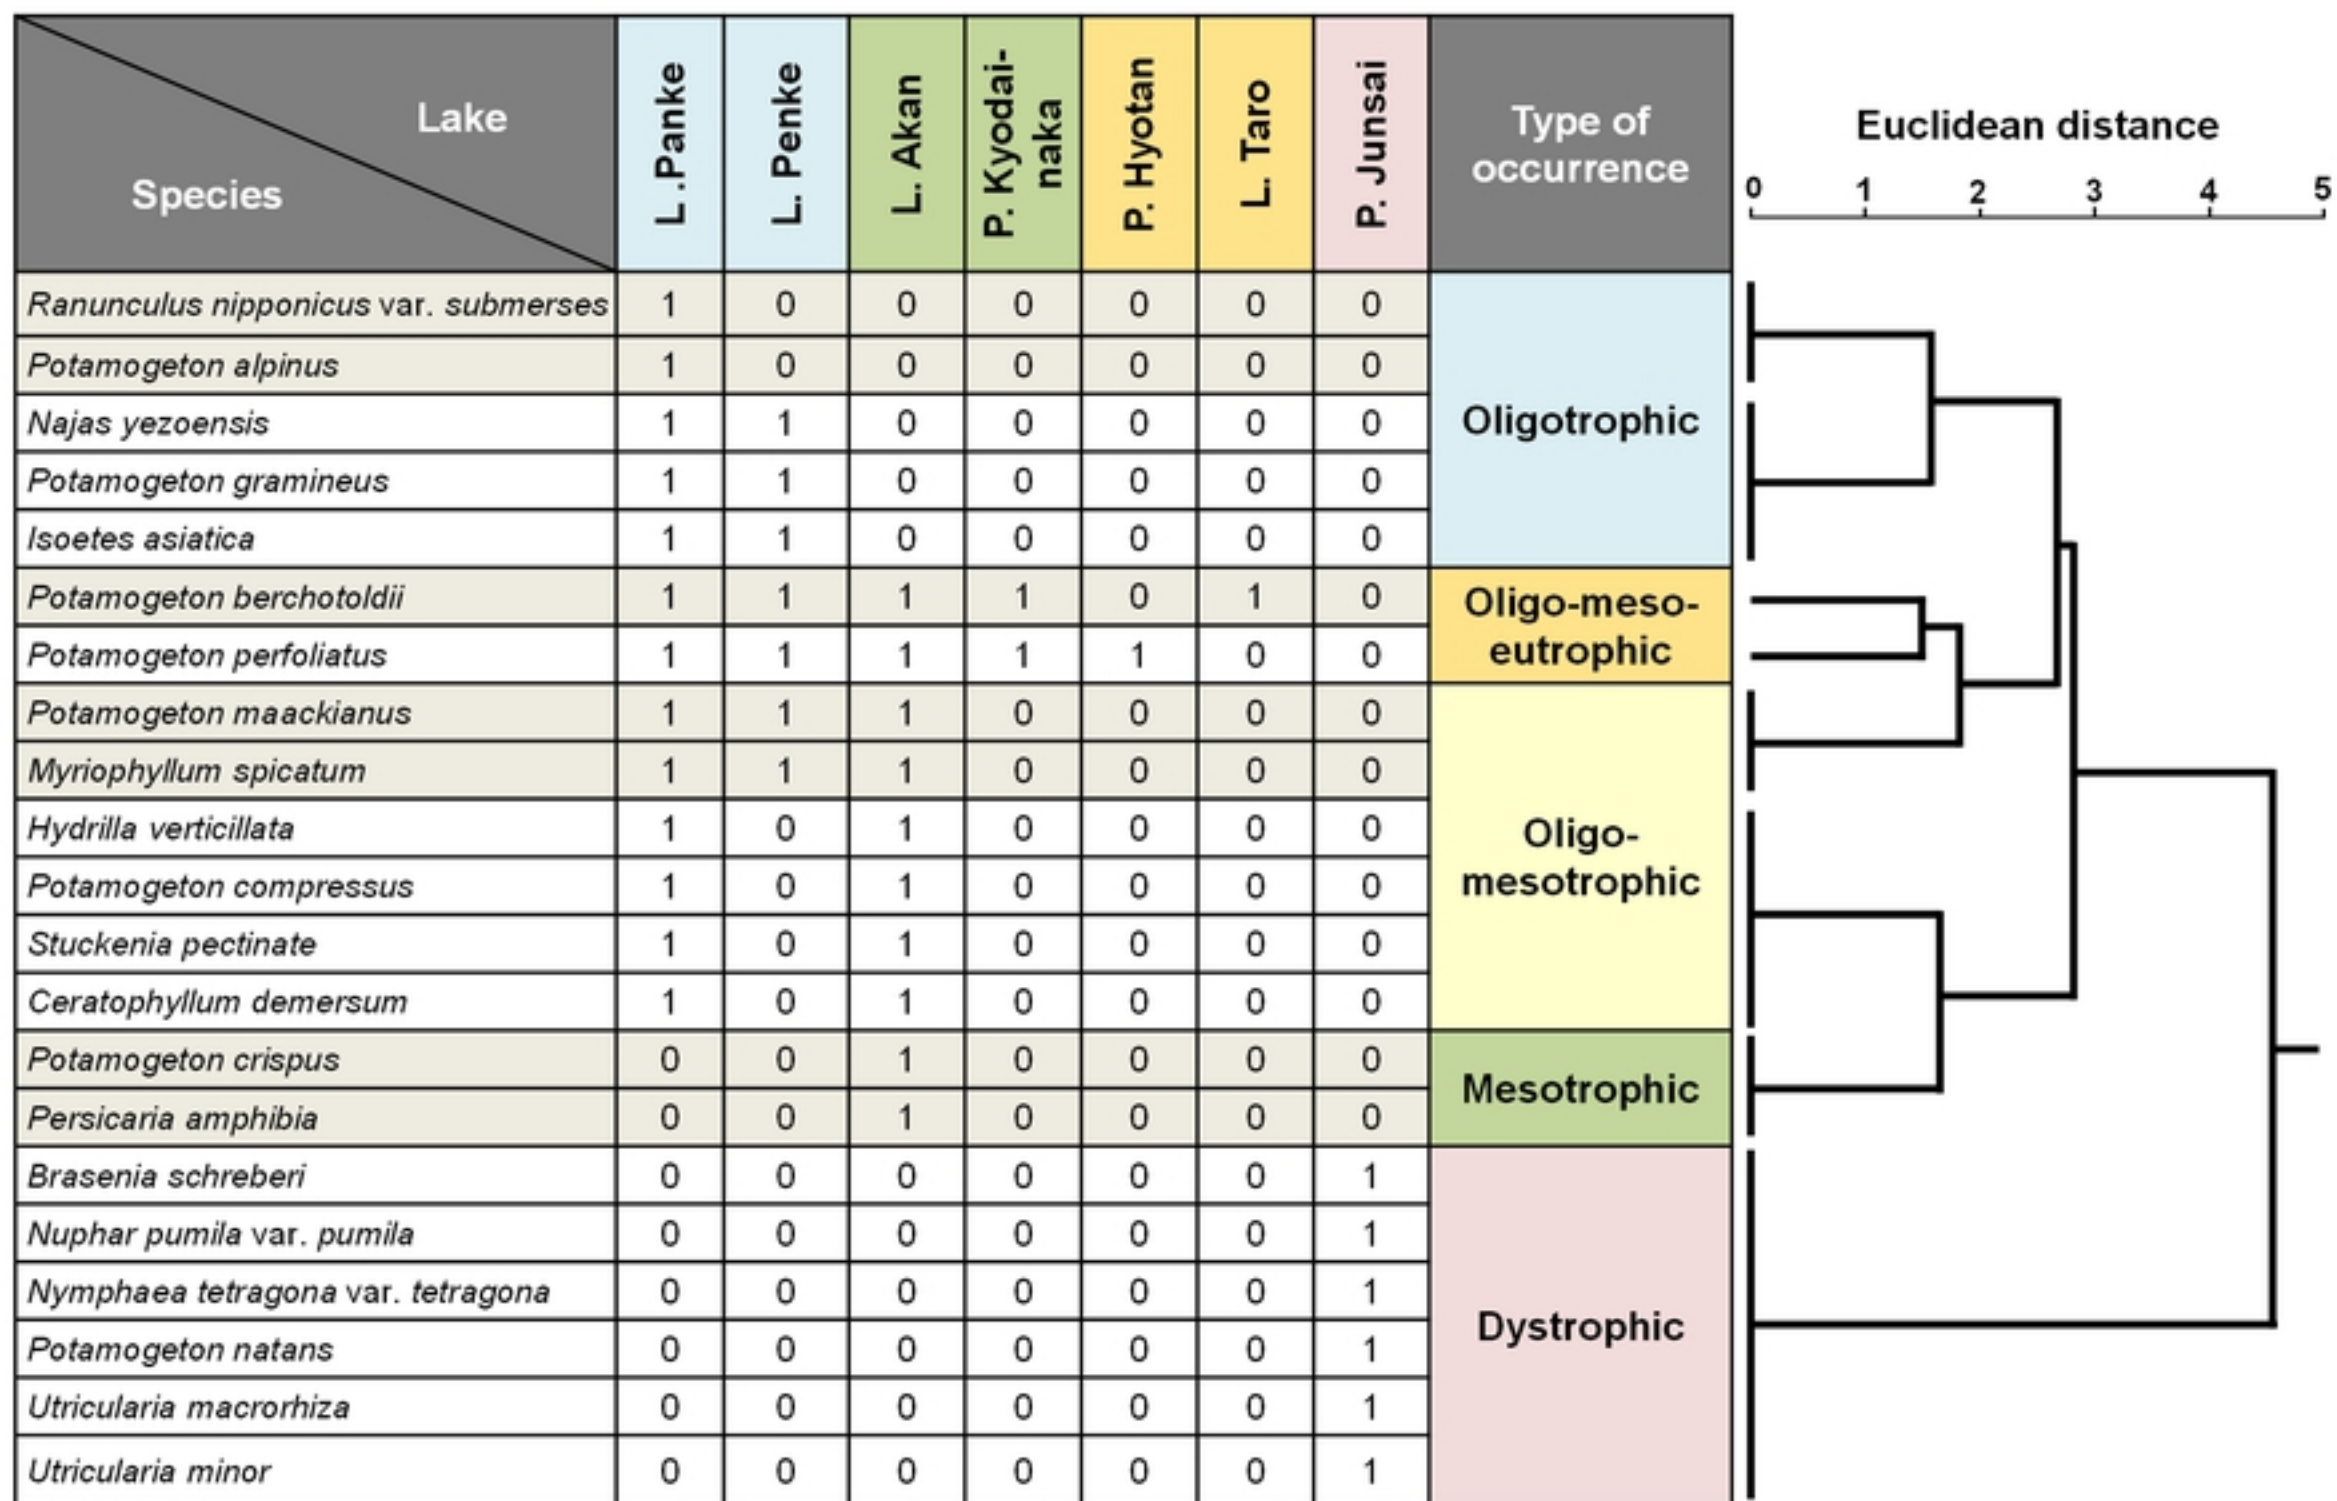

Figure



| Occurrence type of macrophyte | Species of macrophyte                                                                                                                                                                                             | Trophic type of lake                                                                                                                            |                                                                                                                                  |                                                                                                                             |                                                                                                                           |
|-------------------------------|-------------------------------------------------------------------------------------------------------------------------------------------------------------------------------------------------------------------|-------------------------------------------------------------------------------------------------------------------------------------------------|----------------------------------------------------------------------------------------------------------------------------------|-----------------------------------------------------------------------------------------------------------------------------|---------------------------------------------------------------------------------------------------------------------------|
|                               |                                                                                                                                                                                                                   | Oligotrophic                                                                                                                                    | Mesotrophic                                                                                                                      | Eutrophic                                                                                                                   | Dystrophic                                                                                                                |
| Oligotrophic                  | <i>Ranunculus nipponicus</i> var. <i>submersus</i><br><i>Potamogeton alpinus</i><br><i>Najas yezoensis</i><br><i>Potamogeton gramineus</i><br><i>Isoetes asiatica</i>                                             | 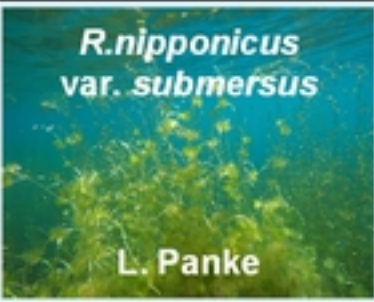<br><i>R. nipponicus</i><br>var. <i>submersus</i><br>L. Panke |                                                                                                                                  |                                                                                                                             |                                                                                                                           |
| Mesotrophic                   | <i>Potamogeton crispus</i><br><i>Persicaria amphibia</i>                                                                                                                                                          |                                                                                                                                                 | <br><i>P. crispus</i><br>L. Akan              |                                                                                                                             |                                                                                                                           |
| Oligo-mesotrophic             | <i>Potamogeton maackianus</i><br><i>Myriophyllum spicatum</i><br><i>Hydrilla verticillata</i><br><i>Potamogeton compressus</i><br><i>Stuckenia pectinata</i><br><i>Ceratophyllum demersum</i>                     | <br><i>M. spicatum</i><br>L. Panke                           | <br><i>M. spicatum</i><br>L. Akan            |                                                                                                                             |                                                                                                                           |
| Oligo-meso-eutrophic          | <i>Potamogeton berchotoldii</i><br><i>Potamogeton perfoliatus</i>                                                                                                                                                 | <br><i>P. perfoliatus</i><br>L. Penke                       | <br><i>P. perfoliatus</i><br>P. Kyodai-naka | <br><i>P. perfoliatus</i><br>P. Hyotan |                                                                                                                           |
| Dystrophic                    | <i>Brasenia schreberi</i><br><i>Nuphar pumila</i> var. <i>pumila</i><br><i>Nymphaea tetragona</i> var. <i>tetragona</i><br><i>Potamogeton natans</i><br><i>Utricularia macrorhiza</i><br><i>Utricularia minor</i> |                                                                                                                                                 |                                                                                                                                  |                                                                                                                             | <br><i>B. schreberi</i><br>P. Junsai |

Figure
